# 1 Verification of our empirical understanding of the physiology and 2 ecology of two contrasting plantation species using a trait database

3 Yoko Osone<sup>1</sup>, Shoji Hashimoto<sup>1</sup>, Tanaka Kenzo<sup>1, 2</sup>

4 <sup>1</sup>Forestry and Forest Products Research Institute, Tsukuba, 305-8687, Japan

5 <sup>2</sup> Japan International Research Center for Agricultural Sciences, Tsukuba 305-8686, Japan

6 Correspondence to: Tanaka Kenzo (mona@affrc.go.jp)

7 **Abstract.** The effects of climate change on forest ecosystems take on increasing importance more than ever. Information on  
8 plant traits is a powerful predictor of ecosystem dynamics and functioning. We reviewed the major ecological traits, such as  
9 foliar gas exchange and nutrients, xylem morphology and drought tolerance, of *Cryptomeria japonica* and *Chamaecyparis*  
10 *obtusa*, which are major timber species in East Asia, especially in Japan, by using a recently developed functional trait database  
11 for both species (SugiHinokiDB). Empirically, *C. obtusa* has been planted under drier conditions, whereas *C. japonica* has  
12 been planted under wetter conditions. Our analyses revealed followings: The maximum photosynthetic rate, stomatal  
13 conductance, foliar nutrient content and soil-to-foliage hydraulic conductance were higher in *C. japonica* than in *C. obtusa*  
14 and were consistent with the higher growth rate of *C. japonica*. In contrast, the foliar turgor loss point and xylem pressure  
15 corresponding to 50% conductivity, which indicate drought tolerance, were lower in *C. obtusa* than in *C. japonica* and are  
16 consistent with the drier habitat of *C. obtusa*. Ontogenetic shifts were also observed; as the age and height of the trees increased,  
17 many foliar nutrient concentrations decreased, and the foliar minimum midday water potential and specific leaf area also  
18 decreased. This suggests that an ontogenetic reduction in photosynthesis occurred due to an increase in drought stress with  
19 tree height and age. However, among the Cupressaceae worldwide, the drought tolerance of *C. japonica* and *C. obtusa* is not  
20 as high. This may be related to the fact that the Japanese archipelago has historically not been subjected to strong dryness. The  
21 maximum photosynthetic rate showed intermediate values within the family, indicating that *C. japonica* and *C. obtusa* exhibit  
22 relatively high growth rates in the Cupressaceae family, and this is thought to be the reason why they have been selected as  
23 economically suitable timber species in Japanese forestry. This study clearly demonstrated that the plant trait database provides  
24 us a promising opportunity to verify out empirical knowledge of plantation management and helps us to understand effect of  
25 climate change on plantation forests by using trait-based modelling.

26

27 Keywords

28 Climate change, database, growth modelling, hinoki cypress, Japanese cedar, plant functional traits

## 29 1 Introduction

30 There is an emerging scientific consensus that the global climate change is resulting in decreased stability in forest ecosystems  
 31 (Mann et al., 1998; Allen et al., 2010). The effects of climate change on the forestry sector have been examined in general  
 32 terms for many regions of the world but rarely with sufficient temporal or spatial resolution to influence regional or local forest  
 33 management (IPCC, 1996; Roos, 1996; Sykes and Prentice, 1996; Bradshaw et al., 2000). The major issues include how the  
 34 ranges in which commercially important tree species are suitable for plantations will change in the future and whether climatic  
 35 influence can be overridden by appropriate forest management. Answering these questions requires a basic understanding of  
 36 the physiology and ecology of target tree species.

37 Information on plant traits, that is, any physiological, morphological or phenological features measurable at the individual  
 38 level (Violle et al., 2007), is now widely used to predict how forests will respond to future climate change (White et al., 2002;  
 39 Sato et al., 2007; Zaehle et al., 2010; Kattge et al., 2020). Process-based models generally use leaf-scale process, such as,  
 40 photosynthetic capacity, stomatal response to vapor pressure deficit (VPD) and respiration of a plant species or a functional  
 41 type for modelling C dynamics under given climate scenarios (Chapin et al., 2011; Toriyama et al., 2021). There are also  
 42 studies focusing on traits more directly related to drought sensitivity for predicting future hydraulic risk. For example, leaf  
 43 water potential at turgor loss ( $\Psi_{tlp}$ ), which had been recognized a classical index of plant water stress, was demonstrated to be  
 44 a powerful indicator of drought tolerance within and across biomes (Bartlett et al., 2012; Peters et al., 2021), while hydraulic  
 45 safety margins, defined as difference between minimum xylem water potential and water potential at which 50% loss of  
 46 conductivity occurs ( $\Psi_{50}$ ) is becoming widely used for a predictor of drought-induced tree mortality (Choat et al., 2012;  
 47 Anderegg et al., 2016). Clearly, trait information holds promise for better understanding of the vulnerability to drought, as  
 48 well as parameterizing models with increased robustness and accuracy.

49 With the increasing demands for trait information, trait databases are becoming key research tool in this study field (Kattge  
 50 et al., 2020). One of the strengths of trait databases is that they provide a wide array of traits for a species all at once, which is  
 51 generally difficult in a single study since measurements of physiological and morphological properties are time- and labour-  
 52 intensive. Another advantage is that they show the variability within a species since they stores data from different studies  
 53 which measured plants at different ages in different locations. Many functional traits change ontogenetically as plants grow  
 54 (Beets and Madgwick, 1988; Bargali et al., 1992; Bond, 2000; Niinemets, 2002; Hooker and Compton, 2003; Polglase et al.,  
 55 2006; Yang and Luo 2011). Understanding the ontogenetic drift of key functional traits is important for impact assessments of  
 56 climate change since forest management is a long-term commitment and requires optimality of adaptation strategies at each  
 57 growth stage (Niinemets, 2010; D'Amato et al., 2011).

58 Recently, we created a trait database for Japanese cedar (*Cryptomeria japonica* D. Don, *Cupressaceae*) and Japanese  
 59 cypress (*Chamaecyparis obtusa* (Siebold et Zucc.) Endl., *Cupressaceae*) (SugiHinokiDB), which contains 24683 data for 177  
 60 plant traits compiled from diverse sources, such as papers, bulletins, reports and books (Osone et al., 2020). *C. japonica* and  
 61 *C. obtusa* produce high-quality wood and have been the most important commercial tree species in Japan. They were also

introduced for timber production in many regions of the world: China, Korean Peninsula, India, Nepal, Azores and Réunion (Government of Azores Islands; Rull et al., 2017; Rai and Schmerbeck, 2018). In Japan, these species were planted to forest sites according to empirically derived rule for species selection. *C. japonica*, which grows faster but thought to be less drought tolerant than *C. obtusa*, is traditionally planted on moist and nutrient-rich sites, whereas *C. obtusa* is planted on relatively dry and nutrient-poor sites (Mashimo, 1960; Hayashi, 1969; Sato, 1971). Since these management practices had worked well until recently, we have paid little attention on the physiological mechanisms underlying their habitat preferences. However, without the knowledge, we cannot predict how the species respond to climate change, nor what the optimal adaptation strategies are. SugiHinokiDB, which compiled traits that are closely related to the life history strategy (Díaz et al., 2004; Grime, 2006; Kattge et al., 2011, 2020; Kleyer et al., 2008), with a special focus on traits related to water relations, may offer a comprehensive characterization of the growth and hydraulics of these species.

In this study, using the SugiHinoki plant trait DB, we verify the empirical knowledge that *C. japonica* grows faster but is less tolerant to drought than *C. obtusa* based on three steps:

(1) We selected 20 traits that are central to the leading dimensions of plant strategy and quantified the differences in those traits between the two species. Our hypothesis is that *C. japonica* has relatively pioneer-like properties, i.e., a higher gas exchange rate, specific leaf area (m<sup>2</sup> g<sup>-1</sup>, SLA), and xylem and foliar water conductivity, whereas *C. obtusa* shows more conservative resource use and a higher drought tolerance.

(2) We also examined the ontogenetic changes in some foliage traits. There is still limited knowledge on age or height depending changes in foliage traits, particularly their species patterns. We demonstrated how the ontogenetic patterns of key foliage traits are different between drought intolerant and drought tolerant species.

(3) Finally, we compare some hydraulic properties of these species with those of Cupressaceae worldwide. Cupressaceae species are thought to differentiate along an aridity gradient and vary greatly in their drought sensitivity. We discussed the adaptive strategies of *C. japonica* and *C. obtusa* in light of the phylogenetic lineage and potential as timber species under future climate.

## 2 Materials and Methods

### 2.1 Plant species

Japanese cedar (*Cryptomeria japonica* (L.f.) D. Don, Sugi cedar), an evergreen conifer, is the only species of the genus *Cryptomeria* in Cupressaceae. It is distributed mainly in Japan, but *C. fortunei*, which is genetically identical to *C. japonica* is scarcely distributed in Zhejiang, China (Tsumura et al., 1995). In Japan, its natural range is Lat. 30° to 40°

93 with mean annual precipitation > 1800 mm (Tsukada 1982). *C. japonica*, which grows rapidly with a maximum height  
94 greater than 50 m, has been used for timber production since the prehistoric period. At present, it dominates  
95 approximately 45% of the forest area in Japan. Japanese cypress (*Chamaecyparis obtusa* (Sieb. et Zucc.) Endl.),  
96 distributed in Japan and Taiwan, is also an evergreen conifer in the *Cupressaceae* family. The northern limit of its natural  
97 range (Lat. 30°-37°) is lower in latitude than that of *C. japonica*. Due to low snow resistance, the species rarely appear  
98 coastal area of Sea of Japan, where there is plenty of snow in winter. Although *C. obtusa* grows slower than *C. japonica*,  
99 it produces high-quality wood and thus has also long been a commercially important species in Japan. *Chamaecyparis*  
100 *obtusa* dominates 15% of the forest area in Japan.

## 101 2.2 Plant trait database

102 The sugi-hinoki database (SugiHinoki DB) consists of 24683 data entries for 177 traits of *C. japonica* and *C. obtusa* from  
103 364 primary sources including journal papers, unpublished data and grey literature (e.g., reports, theses, articles) (Osone et al.,  
104 2020). The traits, grouped into 15 categories by their features (Table 1), are those that are widely agreed on as relevant to plant  
105 life-history strategies, vegetation modelling and global change responses (Grime, 1977; Díaz et al., 2004; Kleyer et al., 2008;  
106 Kattge et al., 2011). Because of the limited distribution of the species, data were mainly obtained from forest sites in Japan  
107 (30°20'N, 130°32'E - 41°25'N, 140°6'E) but also from arboreturns or plantations in Taiwan, Korea and China. The database  
108 includes data from plants grown in plantation forests, natural forests, and those grown under experimental conditions. Each  
109 data entry is accompanied by ancillary information about the location, environmental conditions, experimental treatment,  
110 measurement methods, status of measured individuals in the stand and the position of measured parts (e.g., upper or lower  
111 crown for photosynthetic measurements). Further details on the database are given in Osone et al. (2020).

112 Table 1 lists 108 major plant traits selected from the SugiHinoki DB (Osone et al., 2020). The traits with the highest number  
113 of data entries are mass-based nutrient contents such as mass-based foliar N concentration ( $N_m$ , 2875), K concentration ( $K_m$ ,  
114 1076) and P concentration ( $P_m$ , 1049), which had once been easy-to-measure indices of plant physiological status. Other basic  
115 foliar properties, including photosynthetic capacities ( $A_{max_a}$ , 431;  $A_{max_m}$ , 985), SLA (623), foliar pressure-volume curve  
116 parameters ( $\Psi_{tlp}$ , 423;  $RWC_{tlp}$  194;  $\Psi_{\pi sat}$ , 351;  $\epsilon$ , 154) and midday (minimum) foliage water potential ( $\Psi_{md}$ , 559), are also those  
117 with the highest number of data entries. On the other hand, fewer data are available for properties that require more complex  
118 measurements, such as water conductance/conductivity and the hydraulic safety during water transport. *C. japonica* and *C.*  
119 *obtusa* showed similar patterns in data abundance among traits, but *C. japonica* had more data for most traits (81 out of 108  
120 traits). Each trait of a species showed quite large variation in the values since the database contains data for trees of different  
121 ages, grown under different conditions and measured at different times of the day or year. The data distribution of each trait  
122 showed a convex curve when data were abundant, but distributions were mostly positively skewed.

## 2.3 Selection of traits for the comparison of *C. japonica* and *C. obtusa*

To detect the ecophysiological basis for the empirical knowledge that *C. japonica* grows faster on nutrient-rich moist soil than *C. obtusa*, we selected 20 traits that are considered relevant to plant growth and water relations from SugiHinokiDB. Those include the maximum photosynthetic rate per area ( $A_{max_a}$ ), maximum carboxylation rate per area ( $V_{cmax_a}$ ), maximum electron transport rate per area ( $J_{max_a}$ ), foliar dark respiration rate per area ( $R_a$ ), stomatal conductance for  $CO_2$  per area ( $g_{s_a}$ ), foliar N per area ( $N_a$ ), SLA, foliar water potential at the turgor loss point ( $\Psi_{tlp}$ ), foliar relative water content at the turgor loss point ( $RWC_{tlp}$ ), foliar osmotic potential at full turgor ( $\Psi_{\pi sat}$ ), bulk elastic modulus ( $\epsilon$ ), soil-to-foilage water conductance ( $K_{s_l}$ ), stem specific conductivity ( $K_{stem}$ ), tracheid diameter of the stem, tracheid length of the stem, basic density of the stem, xylem water potential at a 50% loss of conductivity ( $\Psi_{50}$ ), foliage mass (LM), stem mass (SM) and root mass (RM). Abbreviations and units of the traits used in the analyses are shown in Table 1.

## 2.4 Selection of traits for the analysis of foliage age or height dependency

For the analysis of age (size) dependency, we used the foliage nitrogen content per foliage dry mass ( $N_m$ ), foliage phosphorus content per foliage dry mass ( $P_m$ ), foliage potassium content per foliage dry mass ( $K_m$ ), specific leaf area (SLA) and midday foliage water potential ( $\Psi_{md}$ ). These are key traits for plant growth and water relations, and changes in these traits with age or size could have considerable effects on stand growth, carbon and nutrient cycling, and thus forest management. In SugiHinoki DB, they are abundant in data entries from many sources where measurements were performed for many trees of different ages or sizes. However, since the data were not obtained from a single carefully controlled experiment but were the compilation of multiple studies, we could not separate size and age effects that may independently affect foliage traits. Thus, we assessed the dependency by the strength of the correlation between each trait and age and height.

## 2.5 Two measures of foliage-area based traits

Shoots of *C. japonica* have complex structures, with needles being attached densely and helicoidally to a stalk, while shoots of *C. obtusa* are planar with scale-like leaves arranged on a flat surface (Fig. 1). As a result, in *C. japonica*, there are large differences in projected needle area and the shoot silhouette area, and thus the area-based foliar traits differ largely depending on whether the ‘foliage area’ is projected needle (or scale) area ( $A_n$ ) or the shoot silhouette area ( $A_s$ ). The relationship between the trait values presented on a needle area basis ( $T_{leaf}/A_n$ ) and shoot silhouette area basis ( $T_{leaf}/A_s$ ) for any trait ( $T_{leaf}$ ) is given as

$$\frac{T_{leaf}}{A_n} = SPAR \frac{T_{leaf}}{A_s}, \quad (1)$$

where SPAR is the shoot silhouette and projected needle area ratio (Stenberg, 1996; Ishii et al., 2007) and is given as

$$SPAR = \frac{A_s}{A_n}, \quad (2)$$



180 on a foliage area basis ( $A_{\text{max}_{\text{an}}}$ ,  $V_{\text{cmax}_{\text{an}}}$ ,  $J_{\text{max}_{\text{an}}}$ ,  $N_{\text{an}}$ ) (Fig. 2a-2d). However, since the two species have completely different  
 181 shoot morphologies (Fig. 1), a simple comparison of these foliage area-based measurements may fail to characterize their  
 182 photosynthetic properties (Smith et al., 1991; Smith and Brewer, 2002). Photosynthetic capacity is usually presented per unit  
 183 foliage area on the assumption that the foliage area represents the amount of solar radiation intercepted. However, the  
 184 interception of solar radiation is not directly related to the total foliage area unless foliage is oriented horizontally. In *C.*  
 185 *japonica*, where needles are attached helicoidally to a stalk, mutual shading could occur within the shoots, which reduces the  
 186 photosynthetic rate per needle area (Stenberg et al., 1995; Stenberg, 1996; Th  r  zien et al., 2007). In such shoots, as in many  
 187 other coniferous shoots, light interception is determined by the shoot silhouette area rather than the total needle area, and  
 188 photosynthetic characteristics should be evaluated based on both photosynthesis per needle area and per shoot silhouette area  
 189 (Stenberg et al., 1995).

190 On a shoot silhouette basis, the photosynthetic capacity and foliar N contents were higher for *C. japonica* ( $A_{\text{max}_{\text{as}}}$ ,  
 191  $V_{\text{cmax}_{\text{as}}}$ ,  $J_{\text{max}_{\text{as}}}$ ,  $N_{\text{as}}$ ) than for *C. obtusa* ( $A_{\text{max}_{\text{an}}}$ ,  $V_{\text{cmax}_{\text{an}}}$ ,  $J_{\text{max}_{\text{an}}}$ ,  $N_{\text{an}}$ ), by 1.9 – 2.1 times (Fig. 3). The marked increases in  
 192 the photosynthetic capacity of *C. japonica* when presented based on the shoot silhouette area are theoretically justified as  
 193 follows. Photosynthesis per silhouette area is photosynthesis per needle area divided by SPAR (eqn. 1), which is 0.53-0.73 in  
 194 *C. japonica* (SugiHinoki DB). The  $A_{\text{max}_{\text{as}}}$  calculated by eqn. 1 with this SPAR and  $A_{\text{max}_{\text{an}}}$  ( $7.55 \mu\text{mol m}^{-2} \text{s}^{-1}$ ) is  $10.34\text{-}14.25$   
 195  $\mu\text{mol m}^{-2} \text{s}^{-1}$ , which is similar to the measured  $A_{\text{max}_{\text{as}}}$  (Fig. 3a). Note that the two measures of photosynthesis are consistent  
 196 in *C. obtusa* in which shoot is planar and SPAR is one. The higher  $A_{\text{max}_{\text{as}}}$  in *C. japonica* than in *C. obtusa* despite the similar  
 197  $A_{\text{max}_{\text{an}}}$  suggests that under saturating irradiance, densely packed needles on the shoots of *C. japonica* can absorb more  
 198 irradiance than the planar shoots of *C. obtusa* and thereby achieve a higher photosynthetic rate per shoot. However, this could  
 199 be at the expense of the photosynthetic efficiency of each needle in *C. japonica*; that is, at low irradiance, the photosynthetic  
 200 rate per needle area could be decreased more than that of *C. obtusa* due to mutual shading of needles.

201 This is analogous to the effects that the different anatomy of sun/shade leaves has on foliar photosynthesis or the different  
 202 structure of grass stands (steep foliage angle)/forb type (vertical foliage) on canopy photosynthesis (Monsi and Saeki, 1953;  
 203 Terashima and Saeki, 1983; Terashima and Hikosaka, 1995). Similar to sun leaves with thick tissue layers and grass stands  
 204 with high LAI, needle clumping would be favourable only if incident light is high and penetrates deep into the shoots. Under  
 205 these conditions, whole shoot productivity could be higher than that of planar shoots where shoot photosynthesis saturates at  
 206 lower light levels. If the incident light is low, however, light attenuates on the upper layers of the shoots without being  
 207 transmitted to deeper layers. Under these circumstances, planar shoots are preferable for higher efficiency of weak light capture  
 208 just as shade leaves or forb-type stands are preferred under low light availability. The differences in the light interception  
 209 between the two shoot types were also reflected in photosynthetic light response curves. *C. japonica* had a lower initial slope  
 210 (0.31) and convexity (0.59) than *C. obtusa* (initial slope, 0.48; convexity, 0.66) since photosynthesis increases and saturates at  
 211 a slower rate with increasing irradiance in three-dimensional shoots (data from SugiHinokiDB). This is a well-documented  
 212 pattern in the photosynthetic light response curves of sun/shade leaves and indicates that *C. obtusa* has characteristics of shade  
 213 leaves in comparison with *C. japonica*. Although our hypothesis that photosynthetic capacity would be higher in *C. japonica*

than in *C. obtusa* was not supported on a per needle basis, their adaptation to different light environments is more apparent in their light use and photosynthesis at the shoot level.

The two shoot types may also differ in total light interception per day. Light interception is the most efficient when leaves are oriented to face the direction of the light source. Therefore, planar shoots (*C. obtusa*) can intercept light more efficiently than shoots that have needles with various orientations (*C. japonica*) when the light source is just above them and is weak. However, since the solar azimuth angle changes considerably during a day, shoots that have needles with various orientations may be able to intercept more light and have higher assimilation rate on a daily basis than planar shoots, especially under strong light conditions (Stenberg et al., 1995; Stenberg, 1996). These results also imply that *C. japonica* is advantageous over *C. obtusa* in open habitats where strong light is available for longer times during a day. Such environments do appear in early stages of plantations before canopy closure. Thus, *C. japonica* may be able to grow faster than *C. obtusa* due to higher daily photosynthesis in this stage of a plantation.

### 3.2.2 SLA

SLA (projected foliage area per foliage mass) was not significantly different between *C. japonica* and *C. obtusa* (Fig. 3a). This contradicts our hypothesis and the vast majority of studies that have reported a correlation between SLA and the relative growth rate across a wide range of plant species (Poorter and Remkes, 1990; Cornelissen et al., 1996; Atkin et al., 1998; Poorter and Van der Werf, 1998; Reich et al., 1998a; Wright and Westoby, 2000; Osone et al., 2008). From the viewpoint of growth analysis, SLA contributes to the relative growth rate because a high SLA is assumed to represent a large photosynthetic surface (=area of light interception) per given foliage biomass (Hunt, 1978; Lambers et al., 2008). However, as discussed above, the relationship between needle area and light interception is not straightforward for three-dimensional shoots, and it is possible that *C. japonica*, with shoots of various needle orientations, has a higher daily assimilation rate than *C. obtusa* with planar shoots in certain environments. On the other hand, the consistent SLA of the two species appears reasonable from the viewpoint of the leaf economic spectrum, a multivariable correlation between key chemical, structural and physiological properties of leaves based on the carbon and nitrogen economy (e.g., Wright et al., 2004). One of the key axes of the leaf economic spectrum is that SLA is positively correlated with the mass based photosynthetic capacity and foliage N concentration and is negatively correlated with foliage longevity (Kikuzawa and Lechowicz, 2011). If so, the two species with a similar photosynthetic capacity (on a needle basis), foliage N concentration (needle basis) and foliage longevity (Fig. 2), should also be similar in SLA.

### 3.2.3 Biomass ratio between foliage and other organs

The biomass ratio between organs is also a factor that affects the growth rate because a relatively high foliar mass equates to a relatively large photosynthetic organ if other factors are equal (Hunt 1978; Lambers et al. 2008). At a given DBH or total biomass, the stem and root biomasses were not significantly different between the species, but foliar biomass and therefore the foliar mass ratio (LMR) were higher in *C. japonica* than in *C. obtusa* (Fig. 4). This tendency was more pronounced

at smaller DBHs or total biomass, suggesting that the initial greater LMR could contribute to faster growth at early stages of *C. japonica* growth. There could be several reasons for the higher LMR in *C. japonica*. Since plants grown under high soil resource availability allocate more biomass to foliage at the expense of roots (Osone and Tatenno, 2005, and references therein), *C. japonica*, which is often planted in fertile wet sites, might allocate more biomass to foliage than *C. obtusa*, which is planted in less fertile and dry sites. Another possible reason is related to the shoot and crown form of *C. japonica*. Generally, the leaf area index ( $\approx$ leaf biomass) is larger in canopies where the light absorption coefficient ( $k$ ) is smaller because light penetrates deeper into the canopy ( $I_x = I_0 \exp(-kF_x$ , where  $I_x$  and  $I_0$  are the photon flux density at depth  $x$  and outside the canopy, respectively) and  $F_x$  is the cumulative LAI at depth  $x$ , first proposed by Monsi and Saeki 1953). One of the factors that decreases  $k$  is a steep foliage inclination (Terashima and Hikosaka, 1995 and references therein), and *C. japonica*, which has three-dimensional shoots, had a lower  $k$  (0.38) than *C. obtusa* with planar shoots (0.97, but only one data entry was available). Therefore, the shoot morphology that allows light penetration deeper into the crown may cause *C. japonica* to have a thick canopy (=high LMR).

### 3.3 Differences in traits related to water use

#### 3.3.1 Stomatal conductance and transpiration rate

*C. japonica* exhibited 1.7- and 1.5-fold higher stomatal conductance to  $\text{CO}_2$  ( $g_{s_{an}}$ ) and transpiration rate ( $E_{an}$ ), respectively, compared with *C. obtusa* (Fig. 5a, 5b). In concert with this, stomatal distribution and anatomy differed largely between the species. Coniferous stomata are generally distributed unevenly on foliar surfaces, forming a species-specific pattern of stomatal clusters called a “white band”. *C. japonica* has two thick white bands on every surface of the triangular pyramid-shaped needles, whereas *C. obtusa* has y-shaped white bands along the rims on the abaxial surface of its scales (Ma et al., 2007; Yazaki et al., 2015; Kim, 2018). In addition to this larger proportional area of white bands to the total foliage surface, the stomatal diameter of *C. japonica* was 1.5 times higher than that of *C. obtusa* (Fig. 5c).

Despite the lower  $g_{s_{an}}$  and  $E_{an}$  in *C. obtusa*,  $A_{max_{an}}$  was not significantly different between the species (Fig. 2a), suggesting that water use efficiency, that is,  $g_{s_{an}}$  or  $E_{an}$  divided by  $A_{max_{an}}$ , is higher in *C. obtusa* than in *C. japonica*. The lower  $g_{s_{an}}$  and  $E_{an}$  and higher water use efficiency are regarded as adaptations of drought-tolerant plants (Kozlowski and Pallardy, 2002), which supports the hypothesis that *C. obtusa* is more drought tolerant than *C. japonica*. However, adaptation to environments with different levels of water availability is represented not only by potential gas exchange rates but also by the magnitude and speed of the stomatal response to changing environments (Oren et al., 1999; Meinzer et al., 2016). Although stomatal sensitivity are less often measured than potential gas exchange rates are and they are not collected in SugiHinokiDB, some studies that estimated canopy stomatal conductance by sap flow measurements suggested that mature *C. japonica* trees were less sensitive to increasing VPD than *C. obtusa* (Kumagai et al., 2008; Tsuruta et al., 2020).

### 276 3.3.2 Foliage PV curve parameters

277 Among the parameters of the pressure-volume curve,  $\Psi_{tlp}$  (foliage water potential at the turgor loss point) showed the  
 278 clearest species difference:  $\Psi_{tlp}$  was larger in *C. obtusa* than in *C. japonica* throughout the year (Fig. 6a). Since plants with  
 279 more negative  $\Psi_{tlp}$  are able to maintain cell turgor pressure under drought stress, thereby sustaining stomatal conductance,  
 280 photosynthesis and growth,  $\Psi_{tlp}$  is thought to be predictive of the drought tolerance of a plant species (Scholander et al., 1965;  
 281 Tyree and Jarvis, 1982; Tognetti et al., 2000; Baltzer et al., 2008; Blackman et al., 2010; Zhu et al., 2018). Indeed, midday  
 282 foliage water potential was lower in *C. obtusa* than in *C. japonica* during summer (Fig. 6c) indicating that *C. obtusa* continued  
 283 to open stomata until the water potential more decreased than that of *C. japonica*. This supported the hypothesis that *C. obtusa*  
 284 is more drought tolerant than *C. japonica*. There are three possible ways in which  $\Psi_{tlp}$  becomes more negative: the  
 285 accumulation of solutes such as sugar (decreases  $\Psi_{\pi sat}$ ), a reduction in the symplastic water content through the redistribution  
 286 of more water outside the cell walls (decreases  $\Psi_{\pi sat}$ ) and an increase in cell wall flexibility (decreases  $\epsilon$ ) (Bartlett et al.,  
 287 2012).  $\Psi_{\pi sat}$  was slightly lower in *C. obtusa* than in *C. japonica*, but the species difference was marginal throughout the year  
 288 (Fig. 6b). Unfortunately,  $\epsilon$  values were limited in the database, and we could not make reliable comparisons of monthly  $\epsilon$   
 289 between the species, but the small difference in  $\Psi_{\pi sat}$  suggests that the lower  $\Psi_{tlp}$  of *C. obtusa* might be due to its presumed  
 290 smaller  $\epsilon$ . Species differences in  $\Psi_{tlp}$  are more often correlated with  $\Psi_{\pi sat}$  than with  $\epsilon$  since a unit decrease in  $\Psi_{\pi sat}$  causes  
 291 a larger decrease in  $\Psi_{tlp}$  than in  $\epsilon$  (Saito et al., 2003; Mitchell et al., 2008; Bartlett et al., 2012; Meinzer et al., 2016). However,  
 292 as was shown in the present study, there are also studies that showed a correlation between  $\Psi_{tlp}$  and  $\epsilon$  (Niinemets, 2001).

293 The other marked difference in the PV curve parameters was that *C. japonica* had higher  $\epsilon$  in winter (Nov-Apr) compared  
 294 to summer (May-Oct), whereas *C. obtusa* showed no seasonal changes in  $\epsilon$  (Fig. 7a). Winter increases in  $\epsilon$  were also reported  
 295 for *Eucalyptus* species (Valentini et al., 2012), Taiwan cedar (Hara et al., 1998) and Patagonian woody shrubs (Scholz et al.,  
 296 2011; Zhang et al., 2016) and are thought to reduce physical injury to cell membranes by making cell walls more rigid (higher  
 297  $\epsilon$ ) during extracellular freezing and/or thawing processes. However, if increases in  $\epsilon$  occur in response to freezing resistance,  
 298 it is not clear why only *C. japonica* exhibited this response while both species exhibited a winter decrease in  $\Psi_{\pi sat}$  (Fig. 7),  
 299 which is also a well-known response to freezing (Sakai, 1982; Sakai and Larcher, 1987). Considering that *C. japonica* is more  
 300 water demanding, another explanation may be possible for the winter increase in  $\epsilon$  — the ‘cell water conservation hypothesis’  
 301 (Cheung et al., 1975; Bartlett et al., 2012). Theoretically, reductions in  $\Psi_{\pi sat}$  decrease both  $\Psi_{tlp}$  and  $RWC_{tlp}$ . However, a  
 302 coordinated reduction in  $\Psi_{\pi sat}$  and an increase in  $\epsilon$  would lower  $\Psi_{tlp}$  while maintaining a constant  $RWC_{tlp}$ , which would  
 303 result in tolerance for freezing and also prevent dangerous cell dehydration and shrinkage. In *C. japonica*,  $\epsilon$  was negatively  
 304 and strongly correlated with  $\Psi_{\pi sat}$  (Fig. 7a), and in accordance with the theory,  $RWC_{tlp}$  remained constant irrespective of  
 305  $\Psi_{\pi sat}$  (Fig. 7b). In contrast, in *C. obtusa*, where reductions in  $\Psi_{\pi sat}$  did not accompany increases in  $\epsilon$ ,  $RWC_{tlp}$  decreased  
 306 with reductions in  $\Psi_{\pi sat}$  (Fig. 7a, 7b). Plant species have a minimum cellular water content to maintain metabolic functions  
 307 (Lawlor and Cornic, 2002). Since *C. japonica* has a higher minimum tissue water requirement for survival than *C. obtusa*

(Sato, 1956), it may adjust  $\varepsilon$  in coordination with  $\Psi_{\text{sat}}$  to constantly maintain RWC<sub>tp</sub> above this minimum tissue water content.

### 3.3.3 Hydraulic architecture

Soil-to-leaf hydraulic conductance ( $K_{\text{S-L}}$ ), an index of whole-plant hydraulic efficiency, was 1.6 times higher in seedlings of *C. japonica* than in seedlings of *C. obtusa* (Fig. 8a). Hydraulic conductance is a major determinant of plant water status and stomatal behaviour (Zimmermann, 1978; Meinzer et al., 2001) because of the relationship  $E_{\text{an}} = K_{\text{S-L}} (\Psi_{\text{pd}} - \Psi_{\text{L}})$ , where  $\Psi_{\text{pd}}$  is the leaf water potential measured at predawn, which represents the soil water potential, and  $\Psi_{\text{L}}$  is the leaf water potential. In accordance with this relationship, *C. japonica*, with a higher  $K_{\text{S-L}}$ , had a higher transpiration rate than *C. obtusa* (Fig. 5b), maintaining a higher midday leaf water potential (Fig. 6c). Extensive measurements of  $K_{\text{S-L}}$  across species have revealed the adaptive significance of hydraulic conductance across functional groups; that is, pioneer, mesic and drought-avoiding species have higher hydraulic conductance than late successional, xeric and drought-tolerant species (Tyree et al., 1998, Nardini and Tyree, 1999, Nardini and Pitt, 1999; Stratton et al., 2000, references in Meinzer et al., 2001). The higher  $K_{\text{S-L}}$  in *C. japonica* than in *C. obtusa* appears in line with this. However, since  $K_{\text{S-L}}$  depends on the water transport distance, here, we used only seedling data where comparisons at similar sizes (ca. 1 m in height) were possible and are not sure whether this is also true for adult trees.

Since  $K_{\text{S-L}}$  is determined by the conductivity of all organs along the whole water transport pathway, knowledge on the hydraulic conductivity of each would provide more insight for water use. Unfortunately, we still have limited knowledge on organ hydraulic conductivity of these species. The only available information, i.e., stem-specific conductivity presented as hydraulic conductance per stem sapwood area ( $K_{\text{stem}}$ ), was not significantly different between the two species (Fig. 8b), suggesting that the higher  $K_{\text{S-L}}$  of *C. japonica* could be due to the higher leaf and/or root hydraulic conductivity of this species.

In addition to hydraulic efficiency, water transport safety is another important factor of hydraulic architecture. Although we have even less information for hydraulic safety than for hydraulic conductivity, xylem pressure corresponding to a 50% loss of conductivity ( $\Psi_{50}$ ), an index of safety from embolism (Choat et al., 2012), was 1.4 times higher in *C. obtusa* than in *C. japonica* (Fig. 8c). This means that *C. obtusa* can endure more severe negative pressure than *C. japonica*, which supports the empirical knowledge that this species is more tolerant to drought. However, in Japan, where precipitation is generally high throughout the year, plants rarely experience such extreme negative pressure, represented by the  $\Psi_{50}$  (-6.7 MPa) in the xylem of *C. obtusa*, and the extent to which the differences in  $\Psi_{50}$  are relevant to their habitat preference is not obvious. Recently,  $\Psi_{\text{e}}$ , which is the xylem pressure at the start of conductivity loss, has been considered to be a more suitable index for drought tolerance than  $\Psi_{50}$  in nonextreme habitats (Meinzer et al., 2009). Although  $\Psi_{\text{e}}$  is less focused on than  $\Psi_{50}$ , studies show that plants control stomatal conductance to maintain xylem pressure near  $\Psi_{\text{e}}$  (Sparks and Black, 1999; Brodribb et al., 2003; Domec et al., 2008), indicating that  $\Psi_{\text{e}}$  could be a key factor linking stomatal control and xylem pressure. Measurements of  $\Psi_{\text{e}}$ , therefore, would lead to a better understanding of differences in the drought response of these species. In conifers, hydraulic

341 vulnerability segmentation, that is, a lower resistance to embolism in the distal segments that ensures the safety of the more  
342 proximal stems, is also a common hydraulic strategy (Johnson et al., 2016). In this case, not the hydraulic resistance of stems  
343 themselves but the differences in resistance between distal segments and more proximal segments (e.g., differences in  $\Psi_{50}$   
344 between leaves and stems) should be more important. However, because characterization of hydraulic safety is tedious and  
345 time-consuming, relatively few data are available in this field overall (Blackman et al., 2010; Santiago et al., 2018), and this  
346 is also the case for these species (Table 1).

347 The tracheid diameter of the stem xylem was 1.26 times larger in *C. japonica* than in *C. obtusa*, and the length was not  
348 significantly different (Fig. 8d, 8e). The basic density of stem wood (wood density) was lower in *C. japonica* than in *C. obtusa*  
349 (Fig. 8f). Generally, the tracheid structure is considered to be closely related to water transport efficiency and drought safety,  
350 such as cavitation in the xylem (Delzon et al., 2010; Jansen et al., 2012). Conducting efficiency increases with tracheid diameter  
351 according to the Hagen–Poiseuille law, and it is also correlated with the tracheid length because a longer tracheid can result in  
352 conductive pits in the end walls, where water flow is significantly limited, being farther apart (Hacke et al., 2006; Pittermann  
353 et al., 2006a, 2010). If so, stem specific conductivity should be higher in *C. japonica* than in *C. obtusa*, but it was not  
354 significantly different between the species (Fig. 8b). The reason is not clear, but the pit structure, which could affect  
355 conductivity and for which we have no information for these species, might play a role (Delzon et al., 2010; Jansen et al.,  
356 2012). A more negative  $\Psi_{50}$  is also known to be associated with a smaller tracheid diameter and greater basic density because  
357 it requires mechanical strength to support the xylem conduit against implosion caused by negative pressures (Hacke et al.,  
358 2001; Pittermann et al., 2006b; Ogasa et al., 2013). The smaller tracheid diameter, higher wood density and more negative  
359 xylem  $\Psi_{50}$  in *C. obtusa* compared with *C. japonica* are in line with the hypothesis.

### 360 3.4 Age and height dependency

361 Tree age and/or size, especially height, usually affect many foliar functional traits, such as photosynthetic traits, stomatal  
362 behaviour, morphology, water use and nutrient concentrations, in various tree species, including angiosperms and  
363 gymnosperms in tropical, temperate, boreal and even semiarid areas (Ellsworth and Reich, 1993; Ryan and Yoder, 1997; Bond,  
364 2000; Rijkers et al., 2000; Koch et al., 2004; Duursma et al., 2006; Kenzo et al., 2006, 2015, 2016; Ryan et al., 2006; Azuma  
365 et al., 2016; Chin and Sillett, 2019; Liu and Hikosaka, 2020). These age- and/or size-related foliage changes are important for  
366 understanding the forest growth rate, timber yield and carbon balance because they have a strong relationship with individual-  
367 based functional traits such as photosynthetic productivity and drought tolerance (Ryan et al., 2006). In this section, we  
368 demonstrate the effects of tree age and/or height on foliar nutrient concentrations, especially nitrogen (N), phosphorus (P) and  
369 potassium (K), specific leaf area (SLA) and midday minimum water potential in the foliage, using a database. These foliar  
370 traits generally indicate the photosynthetic ability and stomatal behaviour of plants, e.g., there is a positive relationship between  
371 the nitrogen concentration and maximum photosynthetic rate at light saturation, and the minimum midday water potential  
372 indicates plant drought stress (Kramer and Boyer, 1995; Lamberts et al., 1998). If we can clearly demonstrate those  
373 relationships in *C. japonica* and *C. obtusa*, the findings will contribute to the development of accurate estimation models to

374 predict future forest production and carbon dynamics in those forests. In addition, since the analysed data sets were obtained  
375 from sunlit foliage, the effects of light intensity on tree height can be ignored as much as possible.

### 376 3.4.1 Foliage nutrient contents

377 Changes in foliar nutrient concentrations with tree age and/or height showed different patterns depending on tree species  
378 and nutrient type. The foliar N concentration was similar among the age classes of *C. japonica*, whereas that of *C. obtusa*  
379 decreased significantly with age (Fig. 9a, 9b). On the other hand, foliar P and K concentrations in *C. japonica* decreased  
380 significantly with age class (Fig. 9c, 9e). A similar age-dependent reduction in the P concentration was observed in *C. obtusa*  
381 (Fig. 9d), although the K concentration was constant with age (Fig. 9f). Various patterns of changes in foliar nutrient contents  
382 with tree size and/or age have been reported. Although several cases indicate an increase in the foliar nitrogen content with  
383 tree size and age (Chen et al. 2018 for N of Fabaceae tree species), many other cases showed decreased (Beets and Madwick,  
384 1988; Polglase and Attiwill, 1992; Bargali et al., 1992; Hooker and Compton, 2003; Tanaka-Oda et al., 2010; Yang and Luo,  
385 2011) or constant (Polglase and Attiwill, 1992; Clinton et al., 2002; Kenzo et al., 2012, 2015; Givnish et al., 2014; Chen et al.,  
386 2018) contents of foliar N and P with tree size and age. These variations may be caused by species-specific traits, soil nutrient  
387 availability, and sampling effects caused by rather small datasets (Thomas and Winner, 2002). In the present study, it is  
388 believed that the influence of sampling effects is small due to the large data sets, e.g., 200-1500 data points (forest age up to  
389 80 years old, tree height up to 40 m and grown on various forest soil types), used to examine the relationship between each  
390 tree species and nutrient. Increasing nutrient accumulation to living biomass and coarse woody debris with forest development  
391 may cause decreased foliar nutrient concentrations with tree age and height through a reduction in soil nutrient availability  
392 (Bond, 2000; Clinton et al., 2002; Chen et al., 2018). A reduction in soil nutrient concentrations with forest development has  
393 been reported in the early stages of forest growth (Ohta, 1990; Kleinman et al., 1995; Hattori et al., 2013). In addition, higher  
394 drought stress, such as hydraulic limitation with tree height, promotes the investment of carbon into foliage compared with  
395 physiological functions, which require more N, P, and K to protect against dehydration (Niinemets, 1997; Thomas, 2010;  
396 Kenzo et al., 2012). As a result, invested carbon dilutes the foliar nutrient concentrations. These changes are likely to be true  
397 for changes in the P and K concentrations of *C. japonica* and *C. obtusa* trees. In contrast, several authors have suggested that  
398 tree size- or age-related foliar N contents may have a unimodal relationship rather than a simple linear relationship (Ishii et al.,  
399 2008; Thomas, 2010; Kenzo et al., 2012). If nonlinear changes in foliar N occurred in each *C. japonica* and *C. obtusa* stand,  
400 it may be difficult to identify a clear linear relationship of N concentration with tree size and height by using the present pooled  
401 analysis. Further studies should consider other factors, such as soil type and slope position, to understand more detailed changes  
402 in foliar nutrients with age and height.

403 The difference in the changes in each nutrient between *C. japonica* and *C. obtusa* is believed to reflect the interspecific  
404 differences in nutrient demand and usage and growth habitats. For example, it has long been known that *C. japonica* forests  
405 are planted under moister conditions in nutrient-rich soil, and their nutrient dynamics are faster than those of *C. obtusa* forests,

which usually grow on upper slopes with poor nutrient and water availability (e.g., Sawata and Kato, 1993; Tanikawa et al., 2014). These differences may affect the age- and height-dependent changes in foliar nutrients.

The stoichiometry of N to P changed with tree age and height based on different patterns of changes in foliar N and P concentrations. In *C. japonica*, where the foliar P concentration decreased with forest age and the N concentration did not change, the NP ratio increased significantly with the age of the forest (Fig. 9g). In *C. obtusa*, the N:P ratio tended to increase but was not significant (slope = 0.024,  $P = 0.34$ ). The NP ratio is an index of soil nutrient limitation, e.g., P limitation occurs if the ratio is higher than 16, N limitation typically occurs if the ratio is lower than 14, and N and P are co-limiting if the value is 14-16 (Koerselman and Meuleman, 1996). The maximum NP ratio of *C. japonica* is 16.9, and 87.2% of all data points have values of 14 or lower, suggesting that *C. japonica* stands are generally N-limited. However, since the NP ratio increases with age, the stands shift from being N- to being P-limited with maturity. *C. obtusa* also has an NP ratio of 14 or less, and approximately 77% of the data points are considered to be in the N-limited range (Fig. 9h).

### 3.4.2 Foliage water potential and specific leaf area (SLA)

As tree height increases, drought stress increases in the upper part of the canopy, which in turn affects morphological and physiological responses of tree foliage (Koch et al., 2004; Ryan et al., 2006). The foliar midday water potential, which indicates the degree of tree drought stress, significantly decreased with height and age in *C. japonica* trees (Fig. 11a, 12a) and with age in *C. obtusa* trees (Fig. 11b). These reductions in tree height have been reported for various tree species worldwide and cause hydraulic limitations, such as a reduction in photosynthesis through stomatal limitations (Fredericksen et al., 1996; Ryan and Yoder, 1997; McDowell et al., 2002; Woodruff et al., 2004; Ishii et al., 2008; Ambrose et al., 2009). Interestingly, the recovery of photosynthetic ability by grafting canopy tree shoots onto saplings of *C. japonica* supported the occurrence of hydraulic limitations in tall trees of this species (Matsuzaki et al., 2005). The slopes of  $\Psi_{md}$  with the tree height of *C. japonica* and *C. obtusa* are  $-0.137$  and  $-0.089$  MPa  $m^{-1}$ , respectively. These slopes are gentler than those of tropical rainforest trees ( $-0.0282$  MPa  $m^{-1}$ , Kenzo et al. 2015) and similar to the temperate conifer *Sequoia sempervirens* ( $-0.0100$  to  $-0.0113$  MPa  $m^{-1}$ ) and Douglas fir ( $-0.019$  MPa  $m^{-1}$ ) (Koch et al., 2004; Ishii et al., 2008). In general, to tolerate a decrease in  $\Psi_{md}$ , the foliar water potential at the turgor loss point ( $\Psi_{tlp}$ ) must be reduced (Inoue et al., 2017; Zhu et al., 2018). Foliar osmotic adjustment as well as structural strength to withstand low negative pressure to achieve lower  $\Psi_{tlp}$  and foliage strength is accompanied by a decrease in SLA. In fact, the SLA of sugi, whose  $\Psi_{md}$  significantly decreased with tree age and height, decreased with tree height and age. Many studies have reported that SLA decreases with tree age and height (Thomas and Winner, 2002; Mediavilla and Escuderl, 2003; Koch et al., 2004; Kenzo et al., 2006, 2015, 2016; Coble et al., 2014; Azuma et al., 2016). In addition, Thomas and Winner (2002) showed that SLA decreases with tree age in all existing studies based on meta-analysis. On the other hand, the SLA of *C. obtusa* did not show a significant change with either tree age or height (Fig. 11d, 12d). Although there was no clear reason, *C. obtusa* is more resistant to drought stress than *C. japonica*, and thus, changes in SLA may be small. However, the smaller size and age range in *C. obtusa* compared with *C. japonica* may cause this constant change in SLA because Shiraki

et al. (2016) recently reported that SLA decreased significantly at a single canopy height in a *C. obtusa* tree. Thus, further data collection on older and taller *C. obtusa* trees is needed to understand tree age and size dependency with respect to SLA.

### 3.5 Comparison with broader species in *Cupressaceae* with respect to drought tolerance

Through the present analysis, clear differences in growth and water use characteristics were observed between *C. japonica* and *C. obtusa*, although the differences were at most ca. 50% (excluding stomatal size). The Cupressaceae family, to which *C. japonica* and *C. obtusa* belong, consists of more than 100 species with a marked diversity in physiology, morphology and habitat preference (Pittermen et al., 2012). How much do the contrasts we found between *C. japonica* and *C. obtusa* in the present study account for the ranges in traits exhibited by all Cupressaceae species? Here, we compare traits related to drought tolerance between the two species and other Cupressaceae species using data from Pitterman et al. (2012) to gain more insight into the ecological characteristics of these species.

Cupressaceae species first appeared in the warm and humid Mesozoic and differentiated in the cool and dry Cenozoic (Gifford and Foster, 1989). Reflecting the climatic conditions under which each species evolves, early diverging species prefer mesic-hydric habitats, while derived species are adapted to arid climates (Pittermann et al., 2012). As a result of these adaptations, the species exhibit a gradient of foliage morphology (from needle-like in basal species to scaly, similar to foliage in derived species) and other drought tolerance or water use characteristics (Pittermann et al., 2010; Brodribb et al., 2014; Gleason et al., 2016). In fact, *Juniperus sabina*, which has needle and scaly foliage at the ontogenic stage within the same individual, showed that needle foliage had higher photosynthesis with lower drought tolerance than scale-like foliage (Tanaka-Oda et al., 2010).

There was a significant relationship between  $\Psi_{50}$  and the foliar and xylem functional traits (Fig. 13). Species with higher wood density (Fig. 13a), lower xylem specific conductivity (Fig. 13b), low stomatal conductance (Fig. 13c), and a lower photosynthetic rate (Fig. 13d) were associated with decreased  $\Psi_{50}$ , indicating a higher ability to withstand drought. The trade-off between xylem water permeability and vulnerability mediated by xylem anatomy has been well documented across Cupressaceae species, although it might not be a global pattern (Meinzer et al., 2009; Gleason et al., 2016). Among these axes, basal species (e.g., *Glyptostrobus*, *Taxodium*, *Metasequoia*) that grow in moist environments have lower  $\Psi_{50}$  with low wood density (Fig. 13a), higher xylem-specific conductivity (Fig. 13b), and higher area-based stomatal conductance and photosynthetic rate (Fig. 13c, 13d), whereas derived species growing in dry environments such as *Callitris*, *Juniperus*, and *Widdringtonia*, are on the opposite side of the axis (Fig. 13a,b,c,d).

The traits of *C. japonica* and *C. obtusa* also fell on these correlation lines (Fig. 13). Among these axes, *C. japonica*, which is more basal than *C. obtusa*, was located next to the lowest  $\Psi_{50}$  (= the highest gas exchange) group, consisting of species of *Glyptostrobus*, *Taxodium*, and *Metasequoia*. This seems reasonable given that these genera form the same clade as *C. japonica*. *C. obtusa*, which had a slightly lower  $\Psi_{50}$  than *C. japonica*, was located almost in the middle of the axes where close relatives, such as *Chamaecyparis lawsonia* (the same genus with *C. obtusa*) and *Thuja* and *Thujopsis* species, occurred. However, across all Cupressaceae species, the difference between *C. japonica* and *C. obtusa* was not large, nor was *C. obtusa* especially high

in drought tolerance within the main Cupressaceae species. Japan, which is surrounded by the sea and has high-altitude mountains, has not suffered an extremely dry climate, even after the Cenozoic era, and only a few species of *Juniperus* with strong drought tolerance grow in alpine and coastal areas. Rather, there exist many relict genera, such as *Chamaecyparis*, *Thuja* and *Thujopsis*, which are located in the middle of the axis. This suggests that the mild climate of the Japanese archipelago became a refugia of these species with moderate drought tolerance in the arid Cenozoic (Farjon, 2008). However, high drought tolerance is generally achieved at the expense of a low growth rate. Therefore, the moderate drought tolerance of *C. obtusa* ensures a moderate growth rate and makes the species a major alternative to *C. japonica* at relatively dry forestry sites in Japan.

#### 4 Implication for climate change

The detailed comparison of two major species highlights the importance of incorporating trait data into forest ecosystem models for more accurately predicting responses to climate change. Parameterizing models with various trait data enables us to obtain more realistic responses of trees and predictions. Recent studies demonstrate the limitations of plant functional type approaches and claim the need for trait-based approaches, for example, hydraulic responses (Anderegg, 2015). Most models at present are plant functional-type based; in other words, default parameters are prepared for different plant functional types; however, recent trait data compilation studies, such as this study, clearly demonstrate the diversity of traits among tree species even in the same plant functional type. The latest study even proposes flexible trait models for the next generation of vegetation models (Berzaghi et al., 2020). These trait-based approaches would succeed more easily in manmade pure forests than in mixed natural forests.

More specifically, our study provides important implications about possible differences in the species' responses to climate change: no differences in SLA and photosynthetic ability per needle area were found between *C. japonica* and *C. obtusa*; on the other hand, the different structures of shoots and canopies between the two species may cause a difference in the amount of photosynthetic production per day. In particular, in the early planting period from just after plantation to canopy closure, *C. japonica* may have more advantages than *C. obtusa* due to its high photosynthetic production under bright light conditions. However, a big-leaf model, which is a typical photosynthesis model, does not explicitly describe the photosynthetic ability per part, structure or mass (Th  r  zien et al., 2007). For instance, values are the same for *C. japonica* and *C. obtusa* in the Biome-BGC model for most of the parameters. The response of stomata to climate change, such as the response of stomatal conductance to vapor pressure deficit (VPD), may differ between *C. japonica* and *C. obtusa*, but it is not clear at this stage due to a lack of data. In other words, it is possible to accurately grasp the type and amount of data that are lacking for modelling by using the database, which allows us to make an experimental plan to efficiently collect data according to a specific purpose. Regarding water use, we found various differences in related traits between *C. japonica* and *C. obtusa*; however, in general, most traits related to drought tolerance and xylem hydraulic safety except for gas exchange traits are rarely incorporated into models. This is perhaps partly because of the lack of data; drought tolerance and xylem hydraulic safety are new fields that have recently emerged.

503 In Japan, *C. obtusa* is a species planted in dry sites, while *C. japonica* is planted in wet sites; however, our compilation  
504 revealed that the drought tolerance of *C. obtusa* was moderate within the wide range of traits of the global Cupressaceae family.  
505 In fact, there are several reports of drought damage in *C. obtusa* forests, particularly in western Japan, which experiences more  
506 severe drought more often than in eastern Japan (Ogawa et al., 1996; Sanui et al., 1998). These facts imply that it is very likely  
507 that not only *C. japonica* but also *C. obtusa* will suffer from possible more severe droughts induced by future climate change.

508

## 509 **5. Conclusion**

510 The present study challenged the empirical knowledge of two contrasting plantation species in Japan. The intensive  
511 analysis of plant trait database clearly demonstrates that tree ecological traits recorded support traditional knowledge and  
512 empirical plantation management, such as preferable planting sites for both *C. japonica* and *C. obtusa*. Overall, even if the  
513 photosynthesis per foliage area is the same for *C. japonica*, photosynthetic production is higher due to the high shoot-level  
514 light utilization efficiency. In addition, high biomass allocation to the foliage and the low wood density of *C. japonica* result  
515 in a high stem volume yield. On the other hand, *C. obtusa* has high drought tolerance due to its lower transpiration rate,  
516 stomatal conductance and water potential at the foliar turgor loss point, whereas its photosynthesis at the shoot level is lower  
517 than that of *C. japonica*. These characteristics are consistent with traditional knowledge of suitable planting sites for both  
518 species (*C. japonica* on wet lower slopes and *C. obtusa* on dry ridges). Our finding that the most functional characteristics  
519 change according to tree age and/or height indicates that forest management also reflects a functional shift with the ontogeny  
520 of the tree. For example, to maximize tree production, fertilization to prevent foliar functional deterioration and thinning to  
521 compensate for the water supply can be considered with forest ageing. Furthermore, those approaches may also help to solve  
522 problems that cannot be addressed by empirical knowledge alone, i.e., the trait database is a powerful tool for modelling and  
523 predicting how forests respond to future temperature and precipitation associated with climate change, long-term cutting  
524 operations (e.g., more than 100 years), and more intense thinning to form mixed forests that contain broadleaf species. On the  
525 other hand, within the global Cupressaceae family, both species have moderate drought tolerance and photosynthetic rates,  
526 and the traits may be consistent with the historical climate of the Japanese archipelago being warm and humid without severe  
527 drought. The relatively low tolerance of both species may indicate a weak ability to withstand severe dry events associated  
528 with future climate change. This study clearly demonstrated that the plant trait database provides us a promising opportunity  
529 to verify out empirical knowledge of plantation strategies and help us to seek more climate change tolerant forest managements.

## 530 **6 Author contributions**

531 YO, SH and TK collected the data, analyzed the data, and drafted and edited the paper.

532

533 **7 Competing interests**

534 The authors declare that they have no conflict of interest.

535

536 **8 Acknowledgements**

537 This study was funded as part of the project “Research on evaluation of influence of climate change on plantation in Japan”  
538 from the Ministry of Agriculture, Forestry and Fisheries.

539 **References**

540 Allen, C. D., Macalady, A. K., Chenchouni, H., Bachelet, D., McDowell, N., Vennetier, M., et al.: A global overview of  
541 drought and heat-induced tree mortal-ity reveals emerging climate change risks for forests, *Forest. Ecol. Manag.*, 259,  
542 660–684, 2010.

543 Ambrose, A. R., Sillett, S. C., and Dawson, T. E.: Effects of tree height on branch hydraulics, leaf structure and gas exchange  
544 in California redwoods, *Plant, Cell Environ.*, 32, 743–757, <https://doi.org/10.1111/j.1365-3040.2009.01950.x>, 2009.

545 Anderegg, W. R. L.: Spatial and temporal variation in plant hydraulic traits and their relevance for climate change impacts on  
546 vegetation, *New Phytol.*, 205, 1008–1014, <https://doi.org/10.1111/nph.12907>, 2015.

547 Anderegg, W. R. L., Klein, T., Bartlett, M., Sack, L., Pellegrini, A. F. A., Choat, B. and Jansen, S.: Meta-analysis reveals that  
548 hydraulic traits explain cross-species patterns of drought-induced tree mortality across the globe, *Proc. Natl. Acad. Sci.*  
549 *U. S. A.*, 113, 5024–5029, doi:10.1073/pnas.1525678113, 2016.

550 Atkin, O. K., Schortemeyer, M., McFarlane, N., and Evans, J. R.: Variation in the components of relative growth rate in 10  
551 *Acacia* species from contrasting environments, *Plant, Cell Environ.*, 21, 1007-1017, 1998.

552 Azuma, W., Ishii, H. R., Kuroda, K., and Kuroda, K.: Function and structure of leaves contributing to increasing water storage  
553 with height in the tallest *Cryptomeria japonica* trees of Japan, *Trees*, 30, 141–152, [https://doi.org/10.1007/s00468-015-](https://doi.org/10.1007/s00468-015-1283-3)  
554 1283-3, 2016.

555 Baltzer, J. L., Davies, S. J., Bunyavejchewin, S., and Noor, N. S. M.: The role of desiccation tolerance in determining tree  
556 species distributions along the Malay-Thai Peninsula, *Funct. Ecol.*, 22, 221–231, [https://doi.org/10.1111/j.1365-](https://doi.org/10.1111/j.1365-2435.2007.01374.x)  
557 2435.2007.01374.x, 2008.

558 Bargali, S. S., Singh, R. P., and Singh, S. P.: Structure and function of an age series of eucalypt plantations in central himalaya,  
559 II. Nutrient dynamics, *Ann. Bot.*, 69, 413–421, <https://doi.org/10.1093/oxfordjournals.aob.a088362>, 1992.

560 Bartlett, M. K., Scoffoni, C., and Sack, L.: The determinants of leaf turgor loss point and prediction of drought tolerance of  
561 species and biomes: A global meta-analysis, *Ecol. Lett.*, 15, 393–405, [https://doi.org/10.1111/j.1461-](https://doi.org/10.1111/j.1461-0248.2012.01751.x)  
562 0248.2012.01751.x, 2012.

563 Beets, P. N., and Madgwick, H. A. I.: Above-ground dry matter and nutrient content of *Pinus radiata* as affected by lupin,  
564 fertiliser, thinning, and stand age, *New Zeal. J. For. Sci.*, 18, 43–64, 1988.

565 Berzaghi, F., Wright, I. J., Kramer, K., Oddou-Muratorio, S., Bohn, F. J., Reyer, C.P.O., et al: Towards a New Generation of  
566 Trait-Flexible Vegetation Models. *Trends Ecol. Evol.*, 35, 191–205, <https://doi.org/10.1016/j.tree.2019.11.006>, 2020.

567 Blackman, C. J., Brodribb, T. J., and Jordan, G. J.: Leaf hydraulic vulnerability is related to conduit dimensions and drought  
568 resistance across a diverse range of woody angiosperms, *New Phytol.*, 188, 1113–1123, [https://doi.org/10.1111/j.1469-](https://doi.org/10.1111/j.1469-8137.2010.03439.x)  
569 [8137.2010.03439.x](https://doi.org/10.1111/j.1469-8137.2010.03439.x), 2010.

570 Bond, B. J.: Age-related changes in photosynthesis of woody plants, *Trends Plant Sci.*, 5, 349–353, 2000.

571 Bradshaw, R. H., Holmqvist, B. H., Cowling, S. A., and Sykes, M. T.: The effects of climate change on the distribution and  
572 management of *Picea abies* in southern Scandinavia, *Can. J. For. Res.* 30, 1992-1998, 2000.

573 Brodribb, T. J., Holbrook, N. M., Edwards, E. J., and Gutiérrez, M. V.: Relations between stomatal closure, leaf turgor and  
574 xylem vulnerability in eight tropical dry forest trees, *Plant, Cell Environ.*, 26, 443–450, [https://doi.org/10.1046/j.1365-](https://doi.org/10.1046/j.1365-3040.2003.00975.x)  
575 [3040.2003.00975.x](https://doi.org/10.1046/j.1365-3040.2003.00975.x), 2003.

576 Brodribb, T. J., McAdam, S. A. M., Jordan, G. J., and Martins, S. C. V.: Conifer species adapt to low-rainfall climates by  
577 following one of two divergent pathways, *Proc. Natl. Acad. Sci.*, 111, 14489–14493,  
578 <https://doi.org/10.1073/pnas.1407930111>, 2014.

579 Carter, G. A., and Smith, W. K.: Influence of shoot structure on light interception and photosynthesis in conifers, *Plant Physiol*,  
580 79, 1038–1043, <https://doi.org/10.1104/pp.79.4.1038>, 1985.

581 Chapin, III F. S., Matson, P. A. and Vitousek, P.: Principles of terrestrial ecosystem ecology, Springer Science & Business  
582 Media, 2011.

583 Chen, L., Deng, Q., Yuan, Z., Mu, X., and Kallenbach, R. L.: Age-related C:N:P stoichiometry in two plantation forests in the  
584 Loess Plateau of China, *Ecol. Eng.*, 120, 14–22, <https://doi.org/10.1016/j.ecoleng.2018.05.021>, 2018.

585 Cheung, Y. N. S., Tyree, M. T., Dainty, J: Water relations parameters on single leaves obtained in a pressure bomb and some  
586 ecological interpretations, *Can. J. Bot.*, 53, 1342-1346, 1975.

587 Chin, A. R., and Sillett, S. C.: Within-crown plasticity in leaf traits among the tallest conifers, *Am. J. Bot.* 106:174-186, 2019.

588 Choat, B., Jansen, S., Brodribb, T. J., Cochard, H., Delzon, S., Bhaskar, R., et al.: Global convergence in the vulnerability of  
589 forests to drought, *Nature*, 491, 752-755, 2012.

590 Clinton, P. W., Allen, R. B., and Davis, M. R.: Nitrogen storage and availability during stand development in a New Zealand  
591 *Nothofagus* forest, *Can. J. For. Res.*, 32, 344–352, <https://doi.org/10.1139/x01-188>, 2002.

592 Coble, A. P., Autio, A., Cavaleri, M. A., et al.: Converging patterns of vertical variability in leaf morphology and nitrogen  
593 across seven *Eucalyptus* plantations in Brazil and Hawaii, USA, *Trees*, 28, 1–15, [https://doi.org/10.1007/s00468-013-](https://doi.org/10.1007/s00468-013-0925-6)  
594 [0925-6](https://doi.org/10.1007/s00468-013-0925-6), 2014.

595 Cornelissen, J. H. C., Diez, P. C., and Hunt, R.: Seedling growth, allocation and leaf attributes in a wide range of woody plant  
596 species and types, *J. Ecol.*, 84, 755-765, <https://doi.org/10.2307/2261337>, 1996.

597 D'Amato, A. W., Bradford, J. B., Fraver, S., Palik, B. J.: Forest management for mitigation and adaptation to climate change:  
598 Insights from long-term silviculture experiments, *For. Ecol. Manag.*, 262, 803-816, 2011.

599 Delzon, S., Douthe, C., Sala, A., Cochard, H.: Mechanism of water-stress induced cavitation in conifers: bordered pit structure  
600 and function support the hypothesis of seal capillary-seeding, *Plant, Cell Environ.*, 33, 2101-2111, 2010.

601 Díaz, S., Hodgson, J. G., Thompson, K., et al.: The plant traits that drive ecosystems: Evidence from three continents, *J. Veg.*  
602 *Sci.*, 15, 295–304, <https://doi.org/10.1111/j.1654-1103.2004.tb02266.x>, 2004.

603 Domec, J.- C., Lachenbruch, B., Meinzer, F. C., Woodruff, D. R., Warren, J. M., and McCulloh, K. A.: Maximum height in a  
604 conifer is associated with conflicting requirements for xylem design, *Proc. Natl. Acad. Sci.*, 105, 12069–12074,  
605 <https://doi.org/10.1073/pnas.0710418105>, 2008.

606 Ellsworth, D. S., and Reich, P. B. Canopy structure and vertical patterns of photosynthesis and related leaf traits in a deciduous  
607 forest, *Oecologia*, 96, 169-178, 1993.

608 Fredericksen, T. S., Steiner, K. C., Skelly, J. M., et al. Diel and seasonal patterns of leaf gas exchange and xylem water  
609 potentials of different-sized *Prunus serotina* Ehrh. trees, *For. Sci.*, 42, 359–365,  
610 <https://doi.org/10.1093/forestscience/42.3.359>, 1996.

611 Farjon, A: Natural history of conifers, Timber Press, Portland, 2008.

612 Foster, A. S., and Gifford, E. M.: Morphology and evolution of vascular plants, Freeman, W. H., New York, 1989.

613 Givnish, T. J., Wong, S. C., Stuart-Williams, H., Holloway-Phillips, M., and Farquhar, G. D.: Determinants of maximum tree  
614 height in Eucalyptus species along a rainfall gradient in Victoria, Australia, *Ecology*, 95, 2991-3007, 2014.

615 Gleason, S. M., Westoby, M., Jansen, S., Choat, B., Hacke, U. G., Prat, R. B., et al.: Weak tradeoff between xylem safety and  
616 xylem-specific hydraulic efficiency across the world's woody plant species, *New Phytol.*, 209, 123–136,  
617 <https://doi.org/10.1111/nph.13646>, 2016.

618 Grime, J.: Evidence for the existence of three primary strategies in plants and its relevance to ecological and evolutionary  
619 theory, *Am. Nat.*, 111, 1169–1194, 1977.

620 Grime, J. P. Trait convergence and trait divergence in herbaceous plant communities: Mechanisms and consequences, *J. Veg.*  
621 *Sci.*, 17, 255–260, <https://doi.org/10.1111/j.1654-1103.2006.tb02444.x>, 2006.

622 Hacke, U. G., Sperry, J. S., Pockman, W. T., Davis, S. D., and McCulloh, K. A.: Trends in wood density and structure are  
623 linked to prevention of xylem implosion by negative pressure, *Oecologia*, 126, 457-461, 2001.

624 Hacke, U. G., Sperry, J. S., Wheeler, J. K., and Castro, L.: Scaling of angiosperm xylem structure with safety and efficiency,  
625 *Tree Physiol.* 26, 689–701, <https://doi.org/10.1093/treephys/26.6.689>, 2006.

626 Hara, M., Norisada, M., Suzuki, M., Tange, T., and Yagi, H.: Changes in water relations with temperature decrease in  
627 *Cryptomeria japonica* and *Taiwania cryptomerioides*, *Bull. Univ. Tokyo For.* 99, 111–123, 1998.

628 Hattori, D., Kenzo, T., Yamauchi, N., Irino, K.O., Kendawang, J. J., Ninomiya, I., and Sakurai, K.: Effects of environmental  
629 factors on growth and mortality of *Parashorea macrophylla* (*Dipterocarpaceae*) planted on slopes and valleys in a  
630 degraded tropical secondary forest in Sarawak, Malaysia, *Soil Sci. Plant Nutr.*, 59, 218-228, 2013.

631 Hayashi, Y.: An illustrated book of useful trees. Seibundoshinkosha, Tokyo, 1969.

632 Hooker, T. D., and Compton, J. E.: Forest Ecosystem Carbon and Nitrogen Accumulation during the First Century after  
633 Agricultural Abandonment. *Ecol Appl* 13:299–313. <https://doi.org/10.1890/1051-0761>, 2003.

634 Hunt, R.: Basic growth analysis. Unwin Hyman, London, 1990.

635 Inoue, Y., Ichie, T., Kenzo, T., Yoneyama, A., Kumagai, T., and Nakashizuka, T.: Effects of rainfall exclusion on leaf gas  
636 exchange traits and osmotic adjustment in mature canopy trees of *Dryobalanops aromatica* (*Dipterocarpaceae*) in a  
637 Malaysian tropical rain forest, *Tree Physiol.*, 37, 1301–1311, <https://doi.org/10.1093/treephys/tpx053>, 2017.

638 Inoue, Y., Araki, M.G., Kitaoka, S., Kenzo, T., and Saito, S. Relationship between projected shoot area and projected needle  
639 area in *Cryptomeria japonica* D. Don trees, *J. Jpn. For. Soc.*, 102, 7-14, 2020, (In Japanese with English summary).

640 Intergovernmental Panel on Climate Change (IPCC): Climate change 1995, The science of climate change, IPCC 1995  
641 Assessment, Cambridge University Press, Cambridge, 1996.

642 Ishii, H., Kitaoka, S., Fujisaki, T., Maruyama, Y., and Koike, T. Plasticity of shoot and needle morphology and photosynthesis  
643 of two *Picea* species with different site preferences in northern Japan, *Tree Physiol.*, 27, 1595–1605,  
644 <https://doi.org/10.1093/treephys/27.11.1595>, 2007.

645 Ishii, H. T., Jennings, G. M., Sillett, S. C., and Koch, G. W.: Hydrostatic constraints on morphological exploitation of light in  
646 tall *Sequoia sempervirens* trees, *Oecologia*, 156, 751–763, <https://doi.org/10.1007/s00442-008-1032-z>, 2008.

647 Jansen, S., Lamy, J. B., Burlett, R., Cochard, H., Gasson, P., and Delzon, S.: Plasmodesmatal pores in the torus of bordered  
648 pit membranes affect cavitation resistance of conifer xylem. *Plant Cell Environ* 35:1109-1120, 2012.

649 Japan Forestry Agency Annual Report on Forest and Forestry in Japan FY 2018: Forest Agency, Tokyo, 2019.

650 Johnson, D. M., Wortemann, R., McCulloh, K. A., Jordan-meille, L., Ward, E., Warren, J. M., Palmroth, S., and Domec, J.-C.:  
651 A test of the hydraulic vulnerability segmentation hypothesis in angiosperm and conifer tree species, *Tree Physiol.*, 36,  
652 983–993, <https://doi.org/10.1093/treephys/tpw031>, 2016.

653 Kattge, J., Bönsch, G., Díaz, S., Lavorel, S., Prentice, L. C., Leadley, P., et al: TRY plant trait database – enhanced coverage  
654 and open access, *Glob. Chang. Biol.*, 26, 119–188, <https://doi.org/10.1111/gcb.14904>, 2020.

655 Kattge, J., Díaz, S., Lavorel, S., Prentice, L. C., Leadley, P., Bönsch, G., et al: TRY - a global database of plant traits, *Glob.*  
656 *Chang. Biol.*, 17, 2905–2935, <https://doi.org/10.1111/j.1365-2486.2011.02451.x>, 2011.

657 Kenzo, T., Ichie, T., Watanabe, Y., Yoneda, R., Ninomiya, I., and Koike, T.: Changes in photosynthesis and leaf characteristics  
658 with tree height in five dipterocarp species in a tropical rain forest, *Tree Physiol.*, 26, 865–873,  
659 <https://doi.org/10.1093/treephys/26.7.865>, 2006.

660 Kenzo, T., Inoue, Y., Yoshimura, M., Yamashita, M., Tanaka-Oda, A., and Ichie, T.: Height-related changes in leaf  
661 photosynthetic traits in diverse Bornean tropical rain forest trees, *Oecologia*, 177, 191–202,  
662 <https://doi.org/10.1007/s00442-014-3126-0>, 2015.

663 Kenzo, T., Yoneda, R., Sano, M., Araki, M., Shimizu, A., Tanaka-Oda, A., et al.: Variations in leaf photosynthetic and  
664 morphological traits with tree height in various tree species in a cambodian tropical dry evergreen forest, Japan Agric.  
665 Res. Q., 46, 167–180, <https://doi.org/10.6090/jarq.46.167>, 2012.

666 Kenzo, T., Iida, S. I., Shimizu, T., Tamai, K., Kabeya, N., Shimizu, A., and Chann, S.: Seasonal and height-related changes in  
667 leaf morphological and photosynthetic traits of two dipterocarp species in a dry deciduous forest in Cambodia, Plant  
668 Ecol. Div., 9, 505–520, 2016.

669 Kikuzawa, K., and Lechowicz, M. J.: Ecology of leaf longevity, Springer Science & Business Media, 2011.

670 Kim, K. W.: Electron microscopic observations of stomata, epicuticular waxes, and papillae in *Chamaecyparis obtusa*:  
671 Reconsidering the traditional concept of Y-shaped white stomatal bands, Microsc. Res. Tech., 81, 716–723,  
672 <https://doi.org/10.1002/jemt.23027>, 2018.

673 Kleinman, P. J. A., Pimentel, D., and Bryant, R. B.: The ecological sustainability of slash-and-burn agriculture, Agric. Ecosyst.  
674 Environ., 52, 235–249, [https://doi.org/10.1016/0167-8809\(94\)00531-I](https://doi.org/10.1016/0167-8809(94)00531-I), 1995.

675 Kleyer, M., Bekker, R. M., Knevel, I. C., et al.: The LEDA Traitbase: A database of life-history traits of the Northwest  
676 European flora, J. Ecol., 96, 1266–1274, <https://doi.org/10.1111/j.1365-2745.2008.01430.x>, 2008.

677 Koch, G. W., Sillett, S. C., Jennings, G. M., and Davis, S. D. The limits to tree height, Nature, 428, 851–854,  
678 <https://doi.org/10.1038/nature02417>, 2004.

679 Koerselman, W., and Meuleman, A. F. M.: The vegetation N:P ratio: a new tool to detect the nature of nutrient limitation, J.  
680 Appl. Ecol., 33, 1441–1450, <https://doi.org/10.2307/2404783>, 1996.

681 Kozłowski, T. T., and Pallardy, S. G.: Acclimation and adaptive responses of woody plants to environmental stresses, Bot.  
682 Rev., 68, 270–334, 2002.

683 Kramer, P. J., and Boyer, J. S. Water relations of plants and soils. Academic press, San Diego, 1995.

684 Kumagai, T., Tateishi, M., Shimizu, T., and Otsuki, K.: Transpiration and canopy conductance at two slope positions in a  
685 Japanese cedar forest watershed, Agric. For. Meteorol., 148, 1444–1455,  
686 <https://doi.org/10.1016/j.agrformet.2008.04.010>, 2008.

687 Lambers, H., Chapin, III, F. S., and Pons, T. L.: Plant physiological ecology, Springer, New York, 2008.

688 Lawlor, D. W., and Cornic, G.: Photosynthetic carbon assimilation and associated, Plant Cell Environ., 25, 275–294,  
689 <https://doi.org/10.1046/j.0016-8025.2001.00814.x>, 2002.

690 Leverenz, J. W., and Hinckley, T. M.: Shoot structure, leaf area index and productivity of evergreen conifer stands, Tree  
691 Physiol. 6, 135–149, <https://doi.org/10.1093/treephys/6.2.135>, 1990.

692 Liu, Z., Hikosaka, K., Li, F., and Jin, G.: Variations in leaf economics spectrum traits for an evergreen coniferous species:  
693 Tree size dominates over environment factors, Funct. Ecol., 34, 458–467, 2020.

694 Ma Q. W., Li, C. S., and Li, F. L.: Epidermal structures of *Cryptomeria japonica* and implications to the fossil record, Acta  
695 Palaeobot., 47, 281–289, 2007.

- 696 Mann, M. E., Bradley, R. S., and Hughes, M. K.: Global-scale temperature patterns and climate forcing over the past six  
697 centuries, *Nature*, 392, 779-787, 1998.
- 698 Mashimo, Y. Studies on the physical properties of forest soil and their relation to the growth of sugi (*Cryptomeria japonica*)  
699 and hinoki (*Chamaecyparis obtusa*), *For. Soils Japan*, 11, 1–182, 1960.
- 700 Matsuzaki, J., Norisada, M., Kodaira, J., Suzuki, M., and Tange, T.: Shoots grafted into the upper crowns of tall Japanese cedar  
701 (*Cryptomeria japonica* D. Don) show foliar gas exchange characteristics similar to those of intact shoots, *Trees*, 19, 198-  
702 203, 2005.
- 703 McDowell, N. G., Phillips, N., Lunch, C., et al: An investigation of hydraulic limitation and compensation in large, old  
704 Douglas-fir trees, *Tree Physiol.*, 22, 763–774, <https://doi.org/10.1093/treephys/22.11.763>, 2002.
- 705 Mediavilla, S., and Escuderl, A.: Mature trees versus seedlings: Differences in leaf traits and gas exchange patterns in three  
706 co-occurring Mediterranean oaks, *Ann. For. Sci.*, 60, 455–460, <https://doi.org/10.1051/forest>, 2003.
- 707 Meinzer, F. C., Clearwater, M. J., and Goldstein, G. :Water transport in trees: Current perspectives, new insights and some  
708 controversies, *Environ. Exp. Bot.*, 45, 239–262, [https://doi.org/10.1016/S0098-8472\(01\)00074-0](https://doi.org/10.1016/S0098-8472(01)00074-0), 2001, 2001
- 709 Meinzer, F. C., Johnson, D. M., Lachenbruch, B., McCulloh, K. A., and Woodruff, D. R.: Xylem hydraulic safety margins in  
710 woody plants: Coordination of stomatal control of xylem tension with hydraulic capacitance, *Funct. Ecol.*, 23, 922–930,  
711 <https://doi.org/10.1111/j.1365-2435.2009.01577.x>, 2009.
- 712 Meinzer, F. C., Woodruff, D. R., Marias, D. E., Smith, D. D., McCulloh, K. A., Howard, A. R., et al.: Mapping ‘hydroscares’  
713 along the iso- to anisohydric continuum of stomatal regulation of plant water status, *Ecol. Lett.*, 19, 1343–1352,  
714 <https://doi.org/10.1111/ele.12670>, 2016.
- 715 Mitchell, P. J., Veneklaas, E. J., Lambers, H., and Burgess, S. S. O.: Leaf water relations during summer water deficit:  
716 Differential responses in turgor maintenance and variation in leaf structure among different plant communities in south-  
717 western Australia, *Plant, Cell Environ.*, 31, 1791–1802, <https://doi.org/10.1111/j.1365-3040.2008.01882.x>, 2008.
- 718 Monsi, M., and Saeki, T.: Über den lichtfaktor in den pflanzengesellschaften und seine bedeutung für die stoffproduktion, *J.*  
719 *Japanese Bot.*, 14, 22–52, 1953.
- 720 Nardini, A., and Pitt, F.: Drought resistance of *Quercus pubescens* as a function of root hydraulic conductance, xylem  
721 embolism and hydraulic architecture, *New Phytol.*, 143, 485-493, 1999.
- 722 Nardini, A., and Tyree, M. T.: Root and shoot hydraulic conductance of seven *Quercus* species, *Ann. For. Sci.*, 56, 371-377,  
723 1999.
- 724 Niinemets, Ü.: Distribution patterns of foliar carbon and nitrogen as affected by tree dimensions and relative light conditions  
725 in the canopy of *Picea abies*, *Trees*, 11, 144–154. <https://doi.org/10.1007/pl00009663>, 1997.
- 726 Niinemets, Ü.: Global-scale climatic controls of leaf dry mass per area, density, and thickness in trees and shrubs, *Ecology*,  
727 82, 453–469, [https://doi.org/10.1890/0012-9658\(2001\)082\[0453:GSCCOL\]2.0.CO;2](https://doi.org/10.1890/0012-9658(2001)082[0453:GSCCOL]2.0.CO;2), 2001.
- 728 Niinemets, Ü.: Stomatal conductance alone does not explain the decline in foliar photosynthetic rates with increasing tree age  
729 and size in *Picea abies* and *Pinus sylvestris*, *Tree Physiol.*, 22, 515-535, 2002.

- 730 Niinemets, Ü.: Responses of forest trees to single and multiple environmental stresses from seedlings to mature plants: past  
731 stress history, stress interactions, tolerance and acclimation, For. Ecol. Manag., 260, 1623-1639, 2010.
- 732 Ogasa, M., Miki, N. H., Murakami, Y., and Yoshikawa, K.: Recovery performance in xylem hydraulic conductivity is  
733 correlated with cavitation resistance for temperate deciduous tree species, Tree Physiol., 33, 335–344,  
734 <https://doi.org/10.1093/treephys/tpt010>, 2013.
- 735 Ogawa, S.: Drought damage of *Cryptomeria japonica* and *Chamaecyparis obtusa* in Kyushu region of Japan, For. Pests, 45,  
736 62–69, 1996 (In Japanese with English summary).
- 737 Ohta, S.: Initial soil changes associated with afforestation with acacia auriculiformis and *Pinus kesiya* on denuded grasslands  
738 of the pantabangan area, central luzon, the philippines. Soil Sci Plant Nutr 36:633–643.  
739 <https://doi.org/10.1080/00380768.1990.10416800>, 1990.
- 740 Oren, R., Sperry, J. S., Katul, G. G., Pataki, D. E., Ewers, B. E., Phillips, N., and Schäfer, K. V. R.: Survey and synthesis of  
741 intra-and interspecific variation in stomatal sensitivity to vapour pressure deficit, Plant Cell Environ. 22, 1515-1526,  
742 1999.
- 743 Osone, Y., Hashimoto, S., Kenzo, T., Araki, M. G., Inoue, Y., Shichi, K., et al.: Plant trait database for *Cryptomeria japonica*  
744 and *Chamaecyparis obtusa* (SugiHinoki DB): Their physiology, morphology, anatomy and biochemistry, Ecol. Res. 35,  
745 274–275, <https://doi.org/10.1111/1440-1703.12062>, 2020.
- 746 Osone, Y., Ishida, A., and Tateno, M.: Correlation between relative growth rate and specific leaf area requires associations of  
747 specific leaf area with nitrogen absorption rate of roots. New Phytol, 179, 417-427, <https://doi.org/10.1111/j.1469-8137.2008.02476.x>, 2008.
- 749 Osone, Y., and Tateno, M.: Nitrogen absorption by roots as a cause of interspecific variations in leaf nitrogen concentration  
750 and photosynthetic capacity, Funct. Ecol. 19, 460-470, <https://doi.org/10.1111/j.1365-2435.2005.00970.x>, 2005.
- 751 Peters, J. M. R., López, R., Nolf, M., Hutley, L. B., Wardlaw, T., Cernusak, L. A. and Choat, B.: Living on the edge: A  
752 continental-scale assessment of forest vulnerability to drought, Glob. Chang. Biol., (January), gcb.15641,  
753 doi:10.1111/gcb.15641, 2021.
- 754 Pittermann, J., Choat, B., Jansen, S., Stuart, S. A., Lynn, L., and Dawson, T. E.: The relationships between xylem safety and  
755 hydraulic efficiency in the *Cupressaceae*: The evolution of pit membrane form and function, Plant Physiol., 153, 1919–  
756 1931, <https://doi.org/10.1104/pp.110.158824>, 2010.
- 757 Pittermann, J., Sperry, J. S., Hacke, U. G., Wheeler, J. K., and Sikkema, E. H.: Inter-tracheid pitting and the hydraulic  
758 efficiency of conifer wood: The role of tracheid allometry and cavitation protection, Am. J. Bot. 93, 1265–1273,  
759 <https://doi.org/10.3732/ajb.93.9.1265>, 2006a.
- 760 Pittermann, J., Sperry, J. S., Wheeler, J. K., Hacke, U. G., and Sikkema, E. H.: Mechanical reinforcement of tracheids  
761 compromises the hydraulic efficiency of conifer xylem, Plant Cell Environ., 29, 1618–1628, 2006b.
- 762 Pittermann, J., Stuart, S. A., Dawson, T. E., Moreau, A. Cenozoic climate change shaped the evolutionary ecophysiology of  
763 the *Cupressaceae* conifers, Proc. Natl. Acad. Sci., 109, 9647–9652. <https://doi.org/10.1073/pnas.1114378109>, 2012.

764 Polglase, P. J., Attiwill, P. M., and Adams, M. A. Nitrogen and phosphorus cycling in relation to stand age of *Eucalyptus*  
765 *regnans* F. Muell, Plant Soil, 142, 177–185. <https://doi.org/10.1007/bf00010964>, 2006.

766 Poorter, H., and Remkes, C : Leaf area ratio and net assimilation rate of 24 wild species differing in relative growth rate,  
767 Oecologia, 83, 553-559, 1990.

768 Poorter, H., and Van der Werf, A.: Is inherent variation in RGR determined by LAR at low irradiance and by NAR at high  
769 irradiance? A review of herbaceous species. Inherent variation in plant growth. In: Physiological mechanisms and  
770 ecological consequences (eds Lambers H, Poorter H, Van Vuuren M), 309-336, Backhuys Publishers, Leiden, 1998.

771 Rai, R. K., and Schmerbeck, J.: Why Forest Plantations Are Disputed? An Assessment of Locally Important Ecosystem  
772 Services from the *Cryptomeria japonica* Plantations in the Darjeeling Hills, India. In: Conifers (ed Gonçalves AC),  
773 IntechOpen, 2018.

774 Reich, P. B., Ellsworth, D. S., and Walters, M. B. Leaf structure (specific leaf area) modulates photosynthesis–nitrogen  
775 relations: evidence from within and across species and functional groups, Funct. Ecol., 12, 948-958, 1998.

776 Rijkers, T., Pons, T. L., and Bongers, F.: The effect of tree height and light availability on photosynthetic leaf traits of four  
777 neotropical species differing in shade tolerance, Funct Ecol, 14, 77-86, 2000.

778 Roos, J.: The Finnish research programme on climate change: Final report, Academy of Finland, Helsinki, 1996.

779 Rull, V., Lara, A., Rubio-Inglés, M. J., Giralt, S., Gonçalves, V., Raposeiro, P., et al.: Vegetation and landscape dynamics  
780 under natural and anthropogenic forcing on the Azores Islands: A 700-year pollen record from the São Miguel Island.  
781 Quat. Sci. Rev., 159, 155-168, 2017.

782 Ryan, M. G., Phillips, N., and Bond, B. J.: The hydraulic limitation hypothesis revisited, Plant, Cell Environ., 29, 367–381.  
783 <https://doi.org/10.1111/j.1365-3040.2005.01478.x>, 2006.

784 Ryan, M. G., and Yoder B. J.: Hydraulic Limits to Tree Height and Tree Growth, Bioscience, 47, 235–242,  
785 <https://doi.org/10.2307/1313077>, 1997.

786 Saito ,T., Tanaka, T., Tanabe, H., Matsumoto, Y., and Morikawa, Y.: Variations in transpiration rate and leaf cell turgor  
787 maintenance in saplings of deciduous broad-leaved tree species common in cool temperate forests in Japan, Tree  
788 Physiol., 23, 59–66, <https://doi.org/10.1093/treephys/23.1.59>, 2003.

789 Sakai, A.: Freezing tolerance of plants and adaptation to the frigidity, Gakkai Shuppan Center, Tokyo, 1982.

790 Sakai, A., and Larcher, W.: Frost survival of plants: responses and adaptation to freezing stress (Vol. 62), Springer Science &  
791 Business Media, 1987.

792 Santiago, L. S., De Guzman, M. E., Baraloto, C., Vogenberg, J. E., Brodie, M., Hérault, B., et al.: Coordination and trade-offs  
793 among hydraulic safety, efficiency and drought avoidance traits in Amazonian rainforest canopy tree species, New  
794 Phytol., 218, 1015-1024, 2018.

795 Sanui, K.: Drought damages on forest in 1994 at Kyushu region, Forest Pests, 47, 2–9 , 1998 (In Japanese with English  
796 summary).

797 Sato, H., Itoh, A., and Kohyama, T.: SEIB-DGVM: A new Dynamic Global Vegetation Model using a spatially explicit  
798 individual-based approach, *Ecol. Mod.*, 200, 279–307, 2007.

799 Sato, K.: Hinoki (*Chamaecyparis obtusa*) of Japan-The first volume. Zenrinkyo, Tokyo, 1971.

800 Satoo, T.: Drought resistance of some conifers at the first summer after their emergence, *Bull Univ. Tokyo For.*, 51, 1–108,  
801 1956.

802 Sawata, S., and Kato, H.: Effect of forest on soil (Part 4) Factors concerning the base accumulation in Sugi and Hinoki soils,  
803 *Japan J. Soil. Sci. Plant Nutr.*, 64, 196–302, 1993.

804 Scholz, F. G., Phillips, N. G., Bucci, S. J., Meinzer, F. C., and Goldstein, G.: Hydraulic capacitance: biophysics and functional  
805 significance of internal water sources in relation to tree size. In: *Size and Age-Related Changes in Tree Structure and*  
806 *Function* (eds Meinzer FC, Lachenbruch B, Dawson TE), 341–361, Springer Netherlands, Dordrecht, 2011.

807 Shiraki, A., Azuma, W., Kuroda, K., and Ishii, H. R.: Physiological and morphological acclimation to height in cupressoid  
808 leaves of 100-year-old *Chamaecyparis obtusa*, *Tree Physiol.*, 37, 1327–1336, <https://doi.org/10.1093/treephys/tpw096>,  
809 2016.

810 Scholander, P. F., Bradstreet, E. D., Hemmingsen, E. A., and Hammel, H. T., Sap pressure in vascular plants: negative  
811 hydrostatic pressure can be measured in plants, *Science*, 148, 339–346, 1965.

812 Smith, W. K., and Brewer, C. A.: The adaptive importance of shoot and crown architecture in conifer trees, *Am. Nat.*, 143,  
813 528–532, <https://doi.org/10.1086/285618>, 2002.

814 Smith, W. K., Schoettle, A. W., and Cui, M.: Importance of the method of leaf area measurement to the interpretation of gas  
815 exchange of complex shoots, *Tree physiol.*, 8, 121–127, 1991.

816 Sparks, J. P., and Black, R. A.: Regulation of water loss in populations of *Populus trichocarpa*: The role of stomatal control  
817 in preventing xylem cavitation, *Tree Physiol*, 19, 453–459, <https://doi.org/10.1093/treephys/19.7.453>, 1999.

818 Stenberg, P.: Simulations of the effects of shoot structure and orientation on vertical gradients in intercepted light by conifer  
819 canopies, *Tree Physiol.*, 16, 99–108, <https://doi.org/10.1093/treephys/16.1-2.99>, 1996.

820 Stenberg, P., Linder, S., and Smolander, H.: Variation in the ratio of shoot silhouette area to needle area in fertilized and  
821 unfertilized Norway spruce trees, *Tree Physiol.*, 15, 705–712, <https://doi.org/10.1093/treephys/15.11.705>, 1995.

822 Stratton, L., Goldstein, G., and Meinzer, F. C.: Stem water storage capacity and efficiency of water transport: their functional  
823 significance in a Hawaiian dry forest, *Plant, Cell Environ.* 23, 99–106, 2000.

824 Syke, M. T., and Prentice, I. C.: Climate change, tree species distributions and forest dynamics: a case study in the mixed  
825 conifer/northern hardwoods zone of northern Europe. *Clim. change* 34,161–177, 1996.

826 Tanaka-Oda, A., Kenzo, T., Koretsune, S., et al.: Ontogenetic changes in water-use efficiency ( $\delta^{13}C$ ) and leaf traits differ  
827 among tree species growing in a semiarid region of the Loess Plateau, China, *For. Ecol. Manage.* 259, 953–957.  
828 <https://doi.org/10.1016/j.foreco.2009.11.037>, 2010.

- bioRxiv preprint doi: <https://doi.org/10.1101/2021.07.23.453564>; this version posted July 23, 2021. The copyright holder for this preprint (which was not certified by peer review) is the author/funder, who has granted bioRxiv a license to display the preprint in perpetuity. It is made available under aCC-BY 4.0 International license.

White, M. A., Thornton, P. E., Running, S. W., and Nemani R. R.: Parameterization and Sensitivity Analysis of the BIOME-  
BGC Terrestrial Ecosystem Model: Net primary production controls, Earth Interact., 4, 1–85,  
[https://doi.org/10.1175/1087-3562\(2000\)004<0003:pasaot>2.0.co;2](https://doi.org/10.1175/1087-3562(2000)004<0003:pasaot>2.0.co;2), 2002.

Woodruff, D. R., Bond, B. J., and Meinzer, F. C.: Does turgor limit growth in tall trees? Plant, Cell Environ., 27, 229–236.  
<https://doi.org/10.1111/j.1365-3040.2003.01141.x>, 2004.

Wright, I. J., Reich, P. B., Westoby, M., et al.: The worldwide leaf economics spectrum, Nature 428, 821–827.  
<https://doi.org/10.1038/nature02403>, 2004.

Wright, I. J., and Westoby, M.: Cross-species relationships between seedling relative growth rate, nitrogen productivity and  
root vs leaf function in 28 Australian woody species, Funct. Ecol., 14, 97–107, 2000.

Yang, Y., and Luo, Y.: Carbon:nitrogen stoichiometry in forest ecosystems during stand development, Glob. Ecol. Biogeogr.  
20, 354–361, <https://doi.org/10.1111/j.1466-8238.2010.00602.x>, 2011.

Yazaki, K., Tobita, H., Kitaoka, S., Hiraoka, Y., and Kitaoka, M. Stem growth of six clones of elite tree of *Cryptomeria*  
*japonica* under elevated CO<sub>2</sub> and ozone, Kanto J. For. Res. 66, 163–166, 2015.

Zaehle, S., Friend, A. D., Friedlingstein, P., Dentener, F., Peylin, P., and Schulz, M.: Carbon and nitrogen cycle dynamics in  
the O-CN land surface model: 2. Role of the nitrogen cycle in the historical terrestrial carbon balance, Global  
Biogeochem. Cycles., 24, 1–14, <https://doi.org/10.1029/2009GB003522>, 2010, 2010.

Zhang, Y. J., Bucci, S. J., Arias, N. S., et al.: Freezing resistance in Patagonian woody shrubs: the role of cell wall elasticity  
and stem vessel size, Tree Physiol. 36, 1007–1018, <https://doi.org/10.1093/treephys/tpw036>, 2016.

Zhu, S. D., Chen, Y. J., Ye, Q., He, P. C., Liu, H., and Li, R. H.: Leaf turgor loss point is correlated with drought tolerance  
and leaf carbon economics traits, Tree Physiol., 38, 658–663, <https://doi.org/10.1093/treephys/tpy013>, 2018.

Zimmermann, M. H.: Hydraulic architecture of some diffuse-porous trees, Can J. Bot. 56, 2286–2295,  
<https://doi.org/10.1139/b78-274>, 1978.

## Table & Figure legends

Table 1 List of 108 major plant traits selected from the SugiHinoki DB. Number of data entries and means and ranges were  
calculated before outliers were removed for subsequent analyses.

Table 2 Species name and abbreviations used in Figure 10. Data on *Cryptomeria japonica* and *Chamaecyparis obtusa* are from  
this study, and other data are from Pittermann et al. 2012.

Fig. 1 Photographs of *Cryptomeria japonica* (top) and *Chamaecyparis obtusa* (bottom). The right side is an example of the  
foliar projected area. Note that the projected area is underestimated in *C. japonica* because the foliage of *C. japonica* has a  
complex three-dimensional structure.

Fig. 2 Photosynthetic properties of *C. japonica* and *C. obtusa*. In *C. japonica*, each trait is presented on a shoot silhouette area  
basis and projected needle area basis. Differences between each *C. japonica* trait (shoot or needle basis) and each *C. obtusa*  
trait were determined by a t-test; \*\*\*, P<0.001; xx, P<0.01; x, P<0.05; ns, not significant.

895

896 Fig. 3 Specific leaf area and leaf longevity of *C. japonica* and *C. obtusa*. Differences between *C. japonica* and *C. obtusa* were  
897 subjected to a t-test; \*\*\*,  $P < 0.001$ ; xx,  $P < 0.01$ ; x,  $P < 0.05$ ; ns, not significant.

898

899 Fig. 4 Ln-transformed organ biomass in relation to ln-transformed DBH (a, c, e) and ln-transformed total mass (b, d, f).

900

901 Fig. 5 Leaf traits of *C. japonica* and *C. obtusa*. In *C. japonica*, each trait is presented on a shoot silhouette area basis and  
902 projected needle area basis. Differences between each *C. japonica* trait (shoot or needle basis) and each *C. obtusa* trait were  
903 determined by a t-test; \*\*\*,  $P < 0.001$ ; xx,  $P < 0.01$ ; x,  $P < 0.05$ ; ns, not significant.

904

905 Fig. 6 Seasonal changes in pressure volume parameters and midday leaf water potential.

906

907 Fig. 7 Relationship between pressure-volume parameters. Data measured from May-Oct and Nov-Apr were pooled. Filled  
908 triangle, *C. japonica* data from May-Oct; Filled circle, *C. japonica* data from Nov-Apr; Open triangle, *C. obtusa* data from  
909 May-Oct; Open circle, *C. obtusa* data from Nov-Apr.

910

911 Fig. 8 Stem hydraulics and xylem anatomy. Differences between the species were examined by a t-test; \*\*\*,  $P < 0.001$ ; xx,  
912  $P < 0.01$ ; x,  $P < 0.05$ ; ns, not significant.

913

914 Fig. 9 Changes in leaf nutrient contents with tree age. Data from plants grown under experimental conditions or in pots were  
915 excluded. Data from plants younger than 100 years old are shown.

916

917 Fig. 10 Changes in leaf nutrient contents with tree height. Data from plants grown under experimental conditions or in pots  
918 were excluded.

919

920 Fig. 11 Changes in midday leaf water potential ( $\Psi_{md}$ ) and SLA with tree age. Data from plants grown under experimental  
921 conditions or in pots were excluded. Data from plants younger than 100 years old are shown.

922

923 Fig. 12 Changes in midday leaf water potential ( $\Psi_{md}$ ) and SLA with tree height. Data from plants grown under experimental  
924 conditions or in pots were excluded.

925

926 Fig. 13 Relationship between leaf and stem hydraulic properties in Cupressaceae species. Abbreviations of species names are  
927 shown in Table 2. Species in bold type with an asterisk are from this study.

928

929

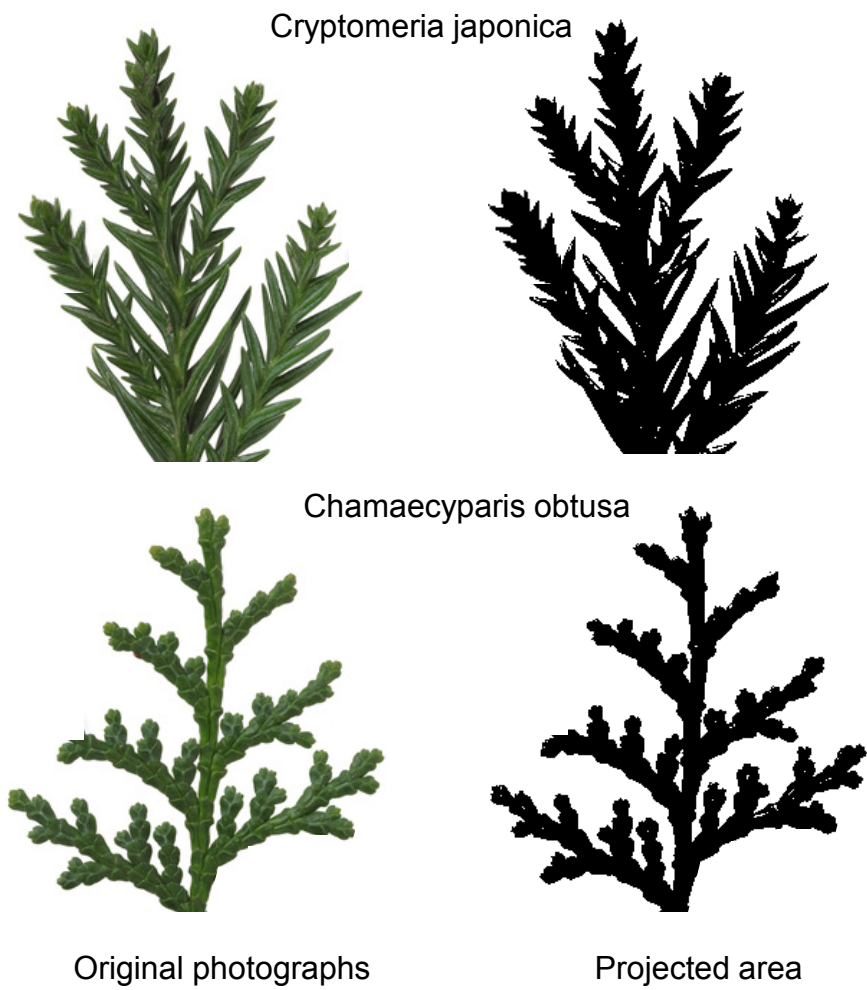

Fig. 1 Photographs of *Cryptomeria japonica* (top) and *Chamaecyparis obtusa* (bottom). The right side is an example of the foliar projected area. Note that the projected area is underestimated in *C. japonica* because the foliage of *C. japonica* has a complex three-dimensional structure.

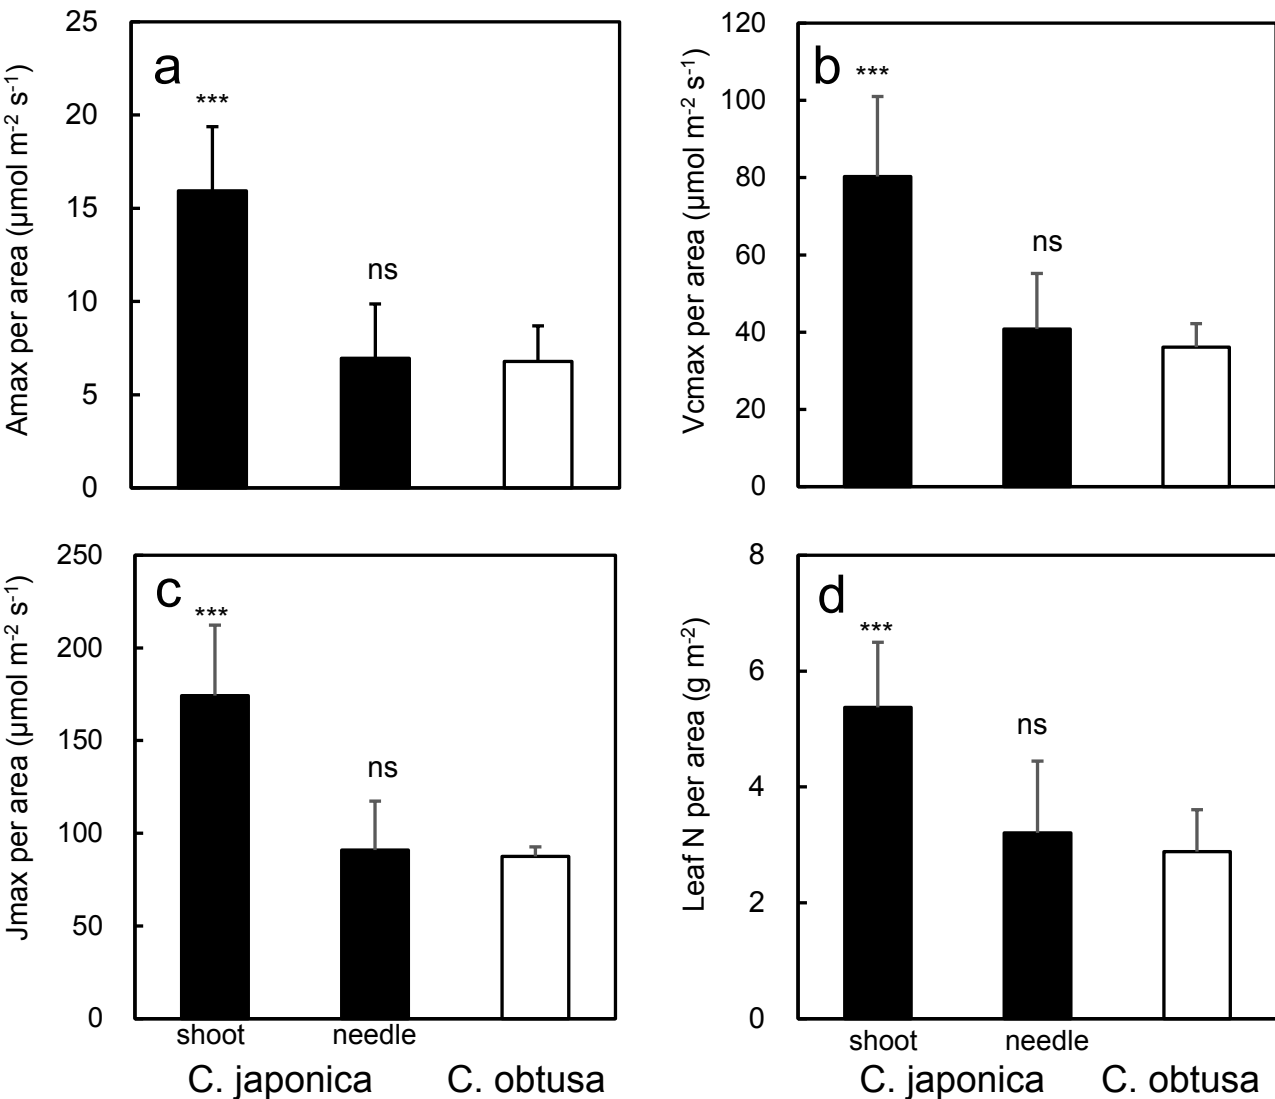

Fig. 2 Photosynthetic properties of *C. japonica* and *C. obtusa*. In *C. japonica*, each trait is presented on a shoot silhouette area basis and projected needle area basis. Differences between each *C. japonica* trait (shoot or needle basis) and each *C. obtusa* trait were determined by a t-test; \*\*\*,  $P < 0.001$ ; xx,  $P < 0.01$ ; x,  $P < 0.05$ ; ns, not significant.

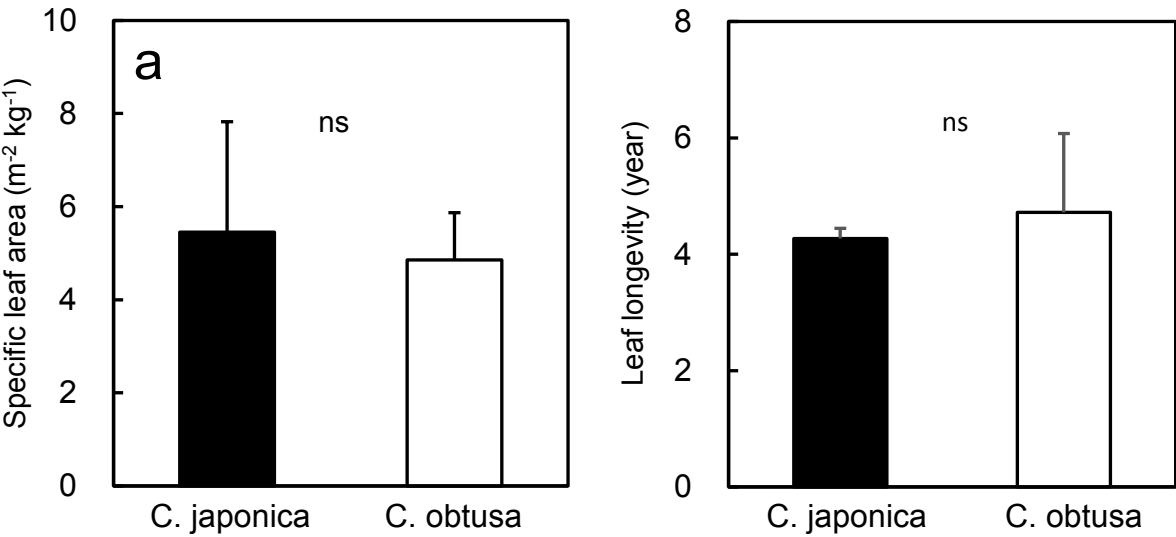

Fig. 3 Specific leaf area and leaf longevity of *C. japonica* and *C. obtusa*. Differences between *C. japonica* and *C. obtusa* were subjected to a t-test; \*\*\*,  $P < 0.001$ ; xx,  $P < 0.01$ ; x,  $P < 0.05$ ; ns, not significant.

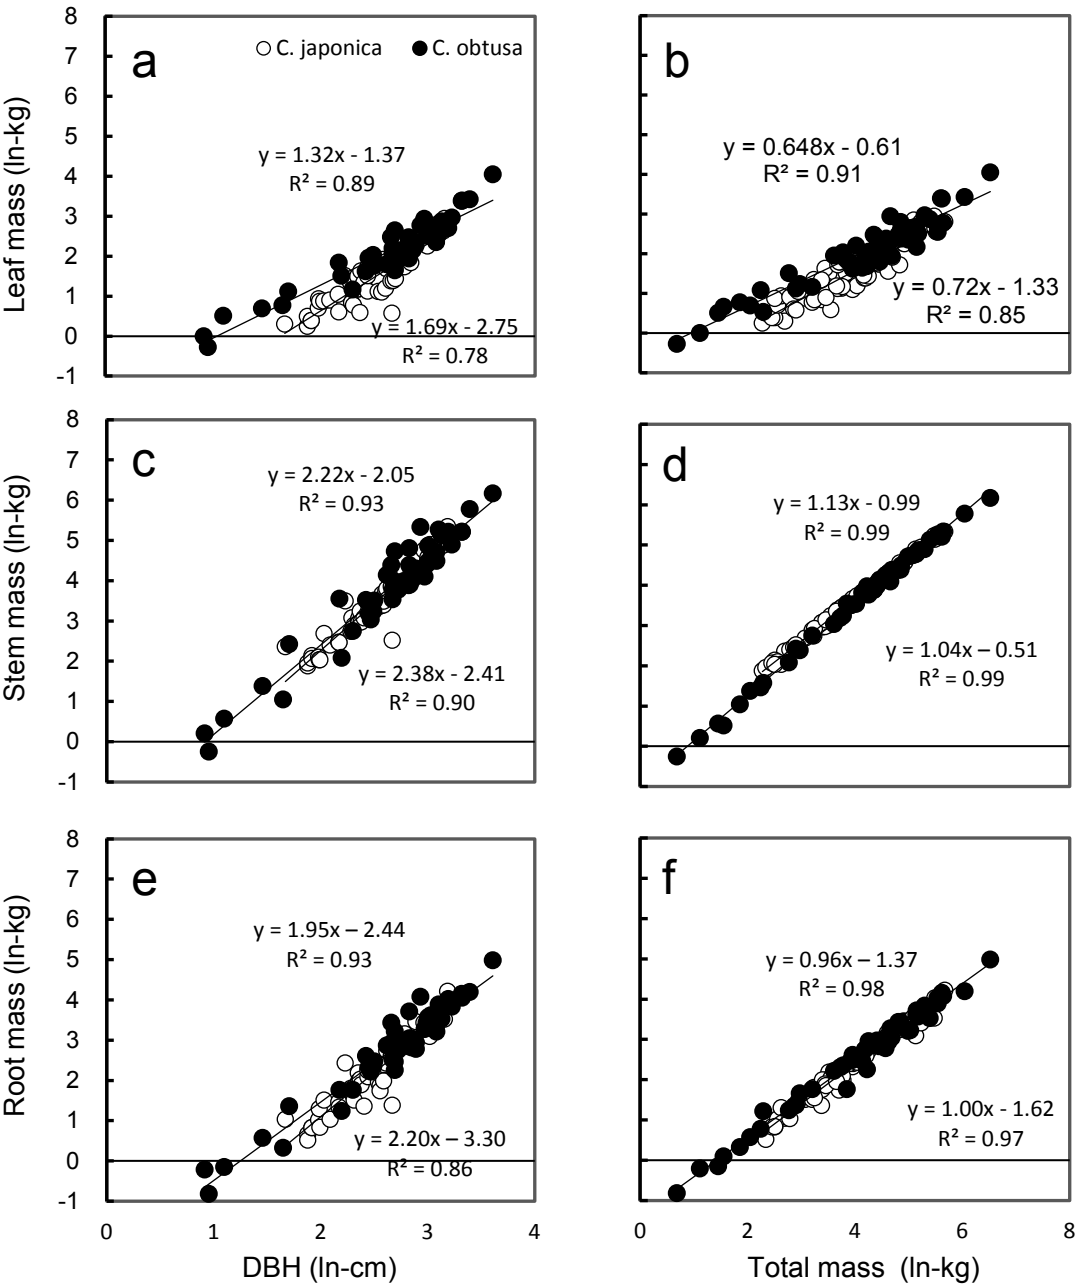

Fig. 4 Ln-transformed organ biomass in relation to ln-transformed DBH (a, c, e) and ln-transformed total mass (b, d, f).

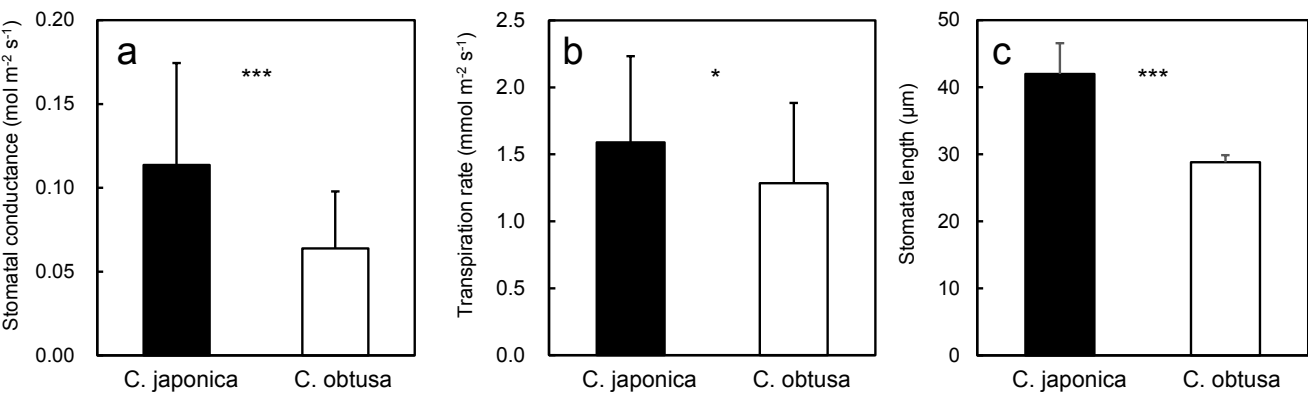

Fig. 5 Leaf traits of *C. japonica* and *C. obtusa*. In *C. japonica*, each trait is presented on a shoot silhouette area basis and projected needle area basis. Differences between each *C. japonica* trait (shoot or needle basis) and each *C. obtusa* trait were determined by a t-test; \*\*\*,  $P < 0.001$ ; xx,  $P < 0.01$ ; x,  $P < 0.05$ ; ns, not significant.

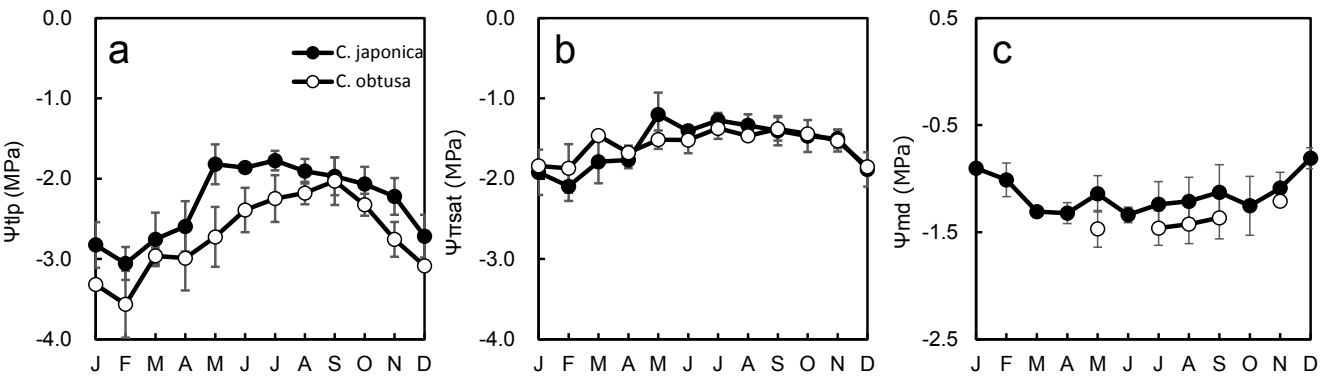

Fig. 6 Seasonal changes in pressure volume parameters and midday leaf water potential.

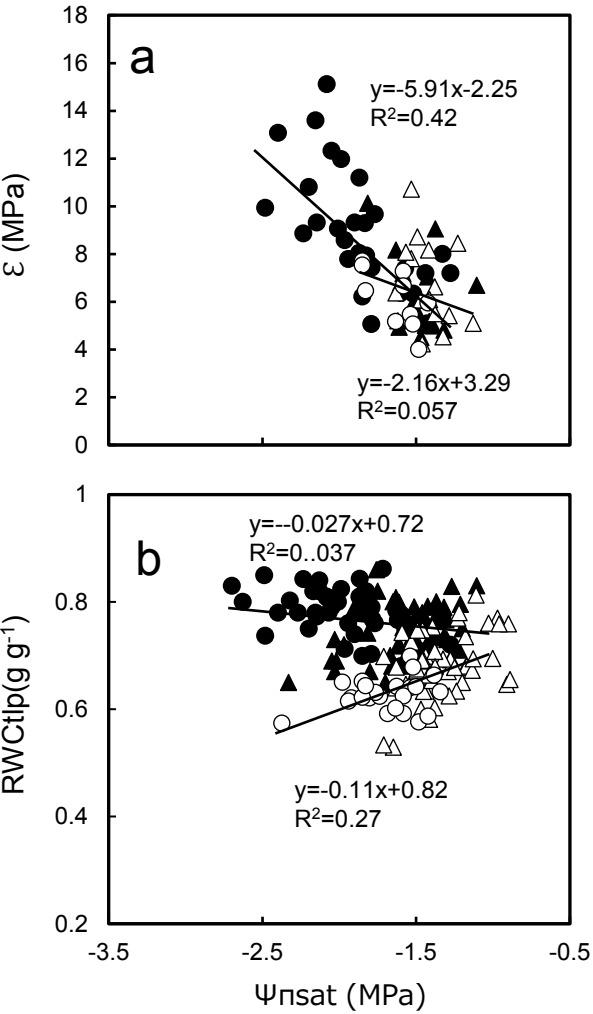

Fig. 7 Relationship between pressure-volume parameters. Data measured from May-Oct and Nov-Apr were pooled. Filled triangle, *C. japonica* data from May-Oct; Filled circle, *C. japonica* data from Nov-Apr; Open triangle, *C. obtusa* data from May-Oct; Open circle, *C. obtusa* data from Nov-Apr.

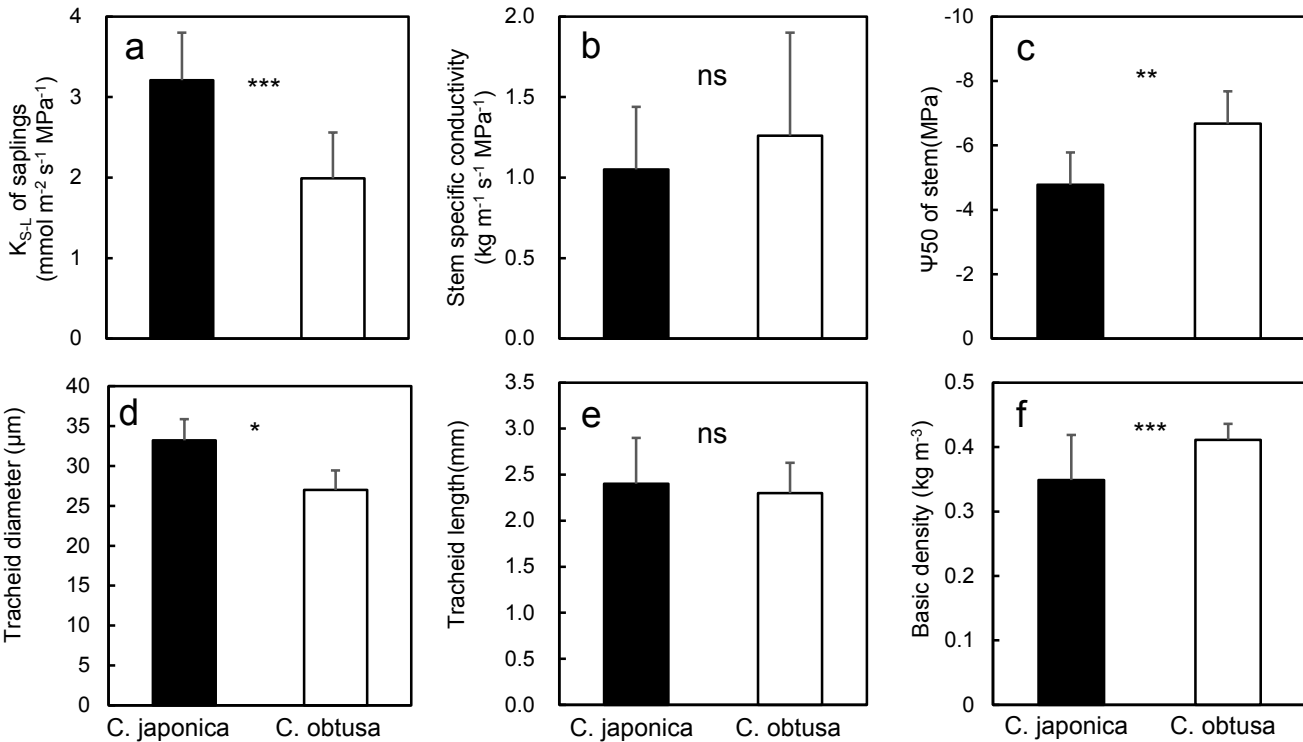

Fig. 8 Stem hydraulics and xylem anatomy. Differences between the species were examined by a t-test; \*\*\*, P<0.001; \*\*, P<0.01; \*, P<0.05; ns, not significant.

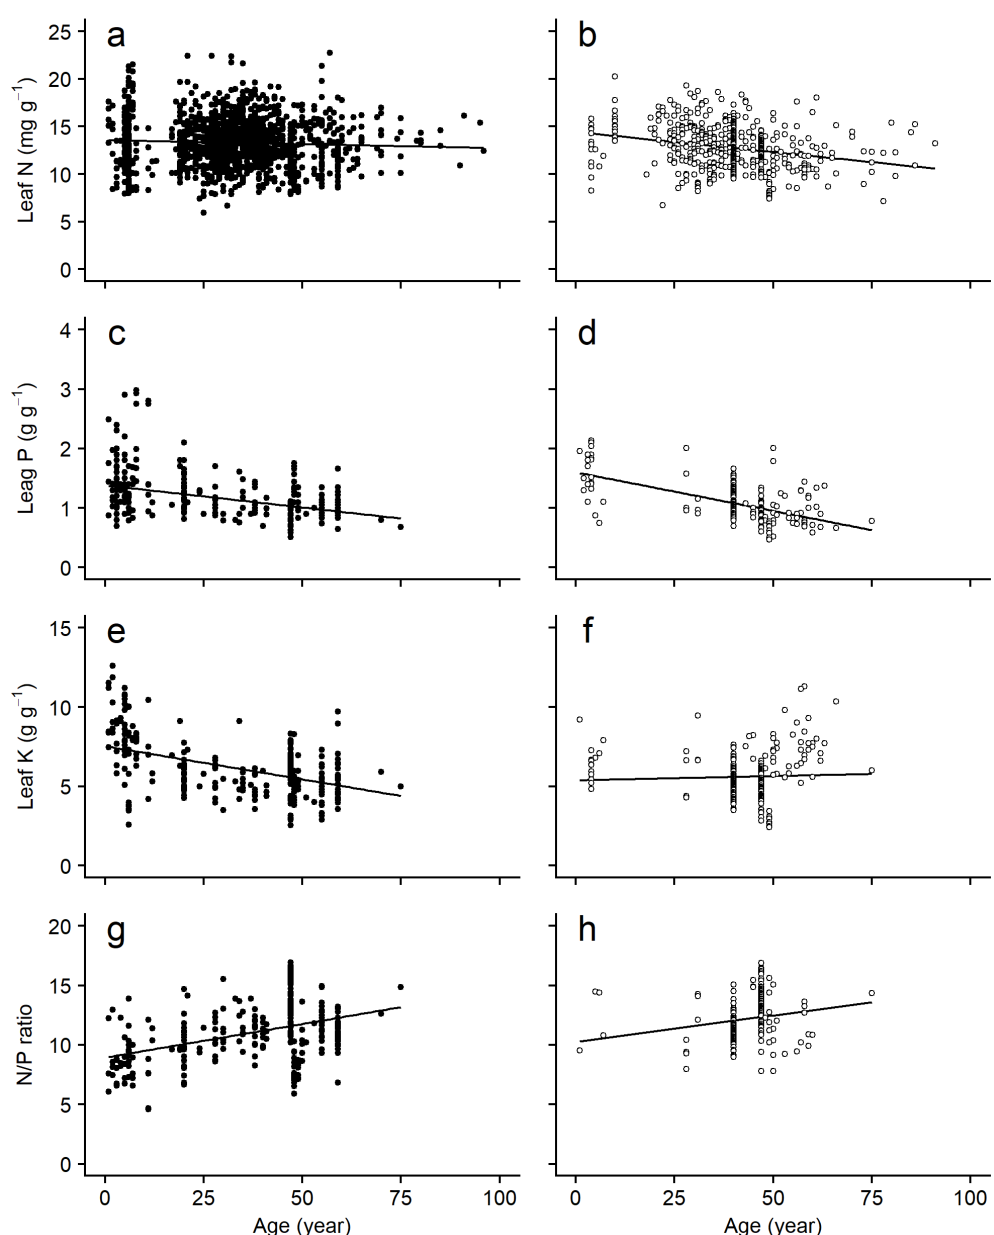

Fig. 9 Changes in leaf nutrient contents with tree age. Data from plants grown under experimental conditions or in pots were excluded. Data from plants younger than 100 years old are shown.

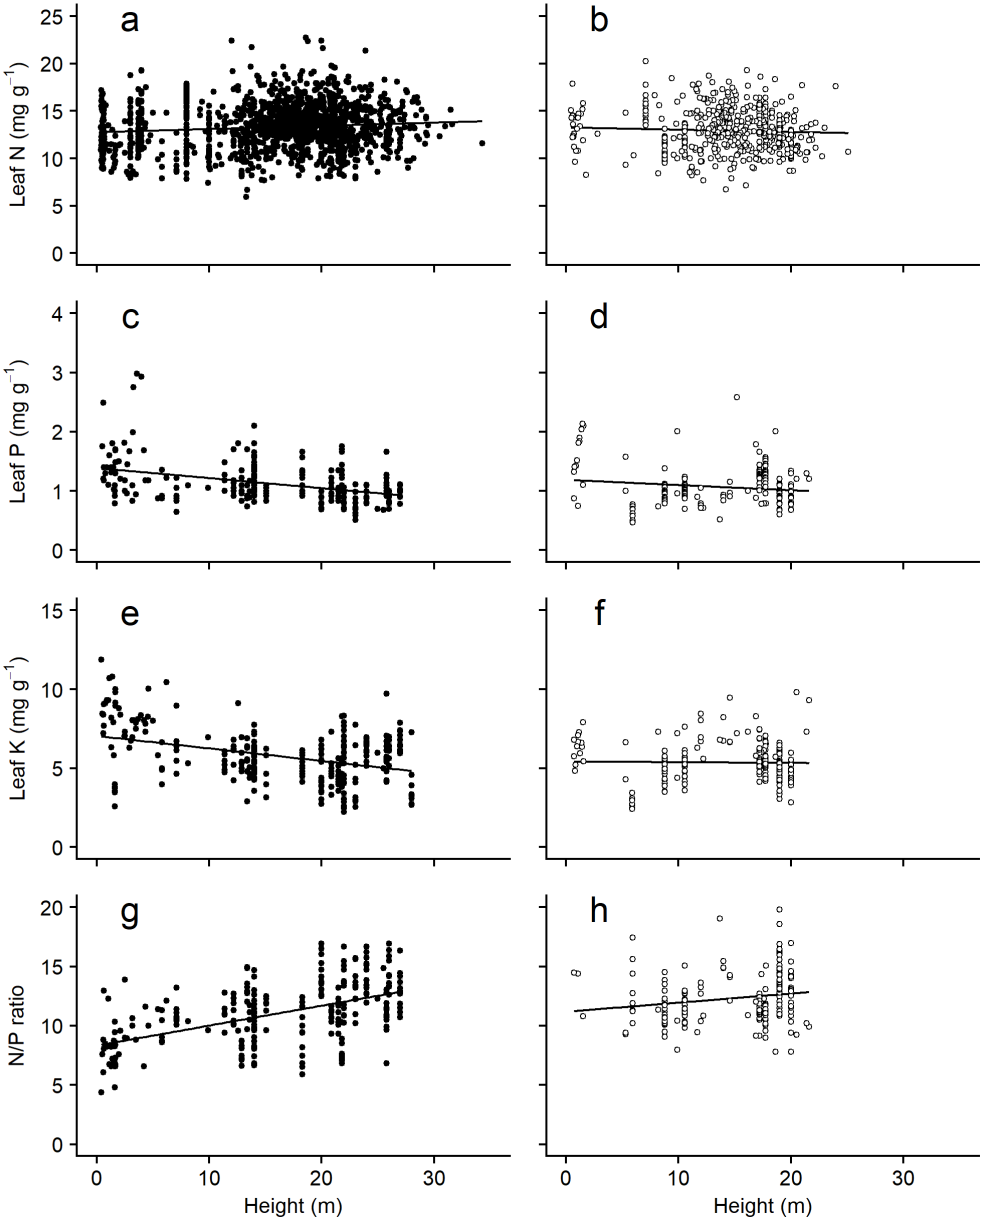

Fig. 10 Changes in leaf nutrient contents with tree height. Data from plants grown under experimental conditions or in pots were excluded.

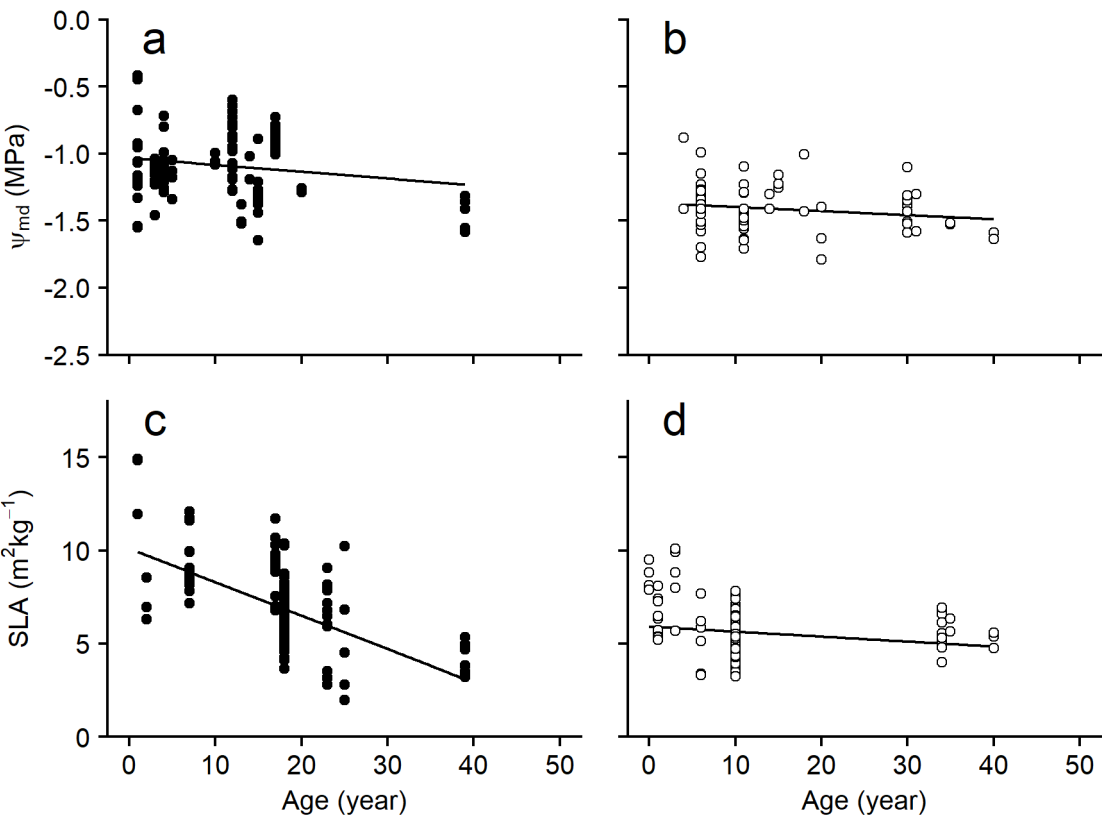

Fig. 11 Changes in midday leaf water potential ( $\Psi_{md}$ ) and SLA with tree age. Data from plants grown under experimental conditions or in pots were excluded. Data from plants younger than 100 years old are shown.

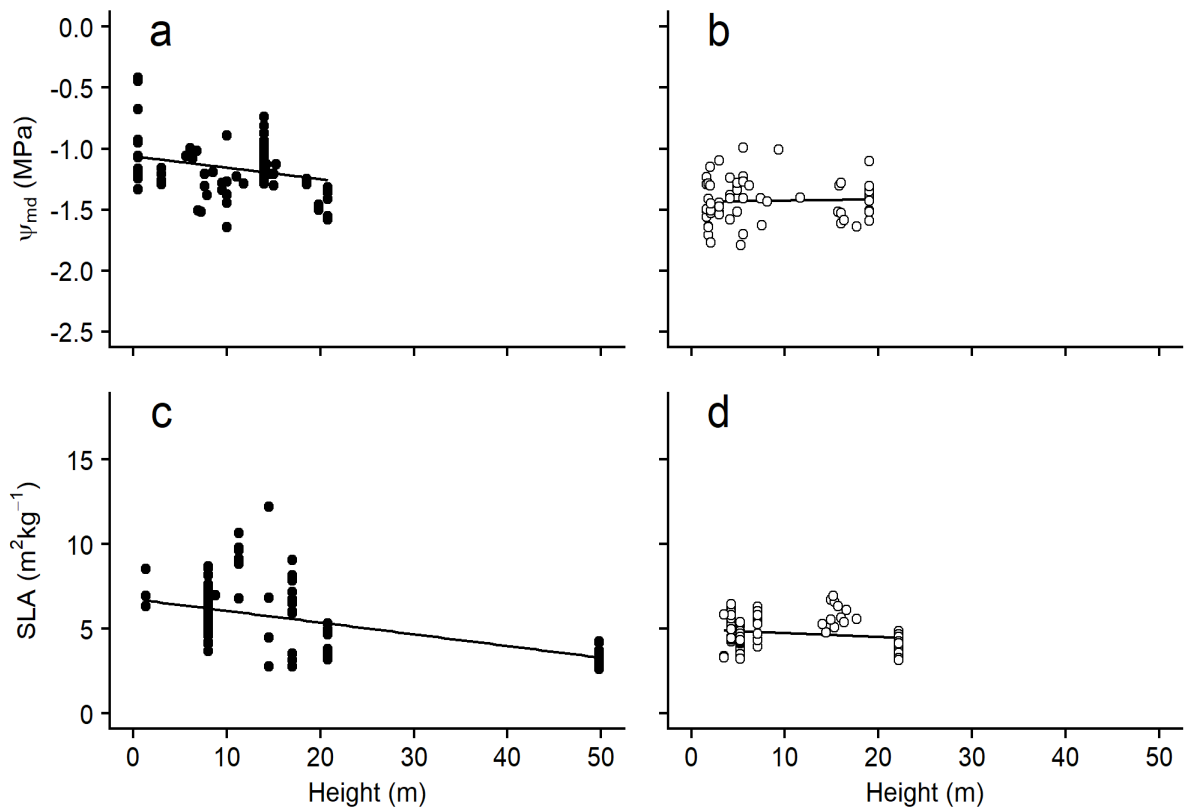

Fig. 12 Changes in midday leaf water potential ( $\Psi_{md}$ ) and SLA with tree height. Data from plants grown under experimental conditions or in pots were excluded.

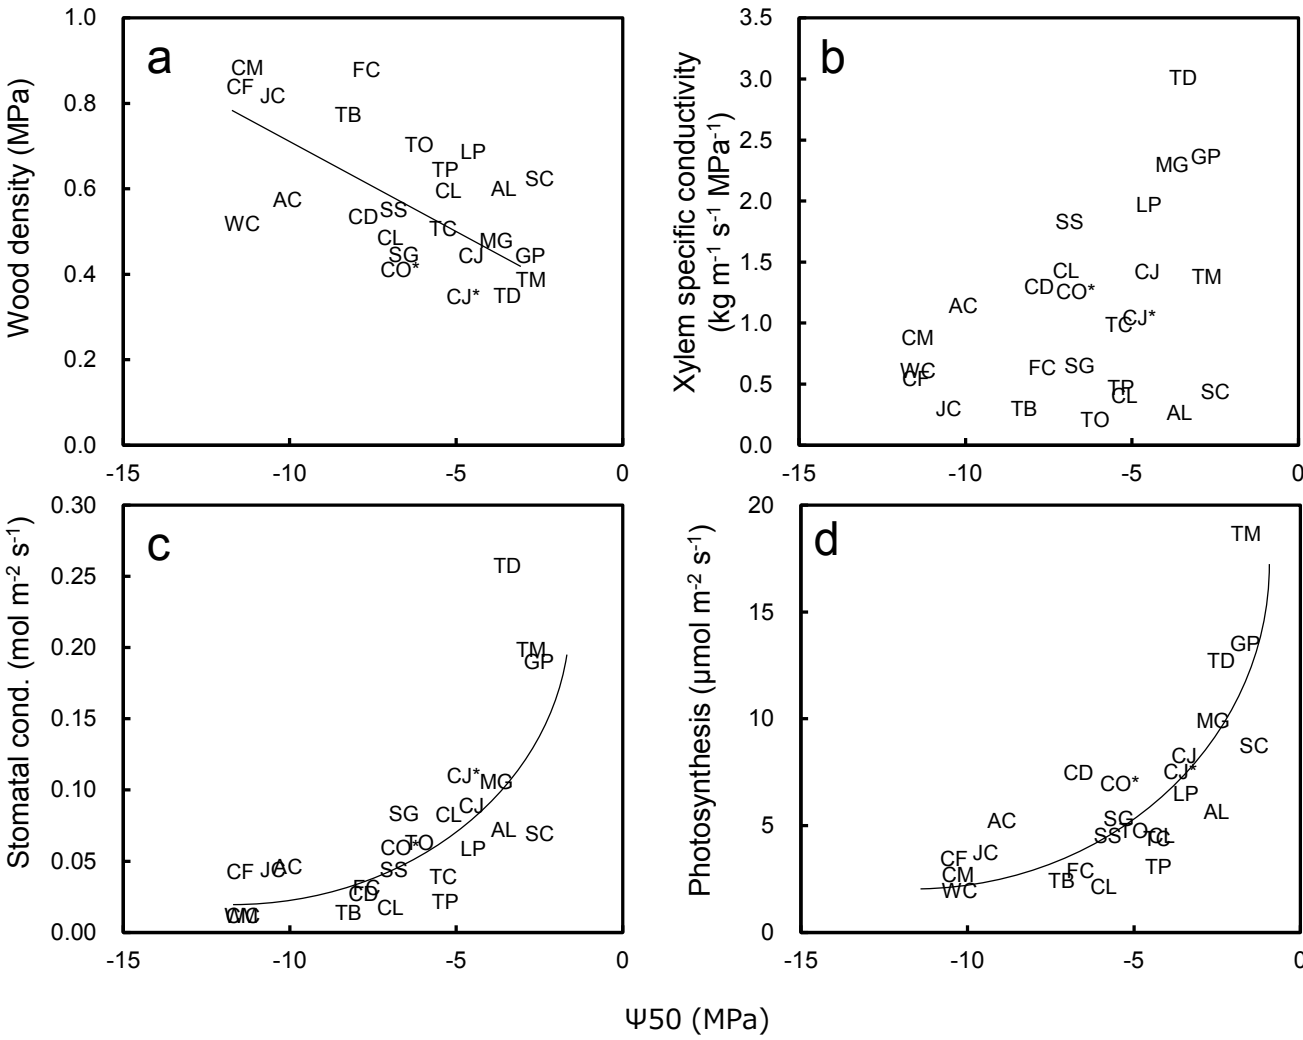

Fig. 13 Relationship between leaf and stem hydraulic properties in Cupressaceae species. Abbreviations of species names are shown in Table 2. Species in bold type with an asterisk are from this study.

| Table 1 List of 108 major plant traits selected from the Sugihinoki DB. Data number, means and ranges were calculated before outliers were removed for the following analyses. |                                                                               |                                                        |                      |       |               |                      |       |               |
|--------------------------------------------------------------------------------------------------------------------------------------------------------------------------------|-------------------------------------------------------------------------------|--------------------------------------------------------|----------------------|-------|---------------|----------------------|-------|---------------|
| Category                                                                                                                                                                       | Trait                                                                         | Unit                                                   | Cryptomeria japonica |       |               | Chamaecyparis obtusa |       |               |
|                                                                                                                                                                                |                                                                               |                                                        | n                    | Mean  | Range         | n                    | Mean  | Range         |
| Photosynthesis                                                                                                                                                                 | Maximum photosynthesis per foliage area (Am <sub>max</sub> )                  | μmol m <sup>-2</sup> s <sup>-1</sup>                   | 216                  | 6.7   | 0.3 – 19.9    | 215                  | 5.3   | 0.4 – 11.3    |
|                                                                                                                                                                                | Maximum photosynthesis rate per foliage dry mass                              | μmol kg <sup>-1</sup> s <sup>-1</sup>                  | 844                  | 30.9  | 0.7 – 120.5   | 141                  | 29.5  | 0.2 – 84.5    |
|                                                                                                                                                                                | Maximum rate of electron transport per foliage area (J <sub>max</sub> )       | μmol m <sup>-2</sup> s <sup>-1</sup>                   | 66                   | 135.4 | 46.0 – 260.6  | 18                   | 76.4  | 49.4 – 95.6   |
|                                                                                                                                                                                | Maximum rate of electron transport per foliage dry mass                       | μmol kg <sup>-1</sup> s <sup>-1</sup>                  | 62                   | 447.7 | 119.9 – 911.9 | 0                    | —     | —             |
|                                                                                                                                                                                | Maximum rate of carboxylation per foliage area (V <sub>cmax</sub> )           | μmol m <sup>-2</sup> s <sup>-1</sup>                   | 228                  | 59.2  | 20.3 – 139.1  | 34                   | 31.1  | 14.7 – 51.1   |
|                                                                                                                                                                                | Maximum rate of carboxylation per foliage dry mass                            | μmol kg <sup>-1</sup> s <sup>-1</sup>                  | 62                   | 228.9 | 50.4 – 493.6  | 0                    | —     | —             |
|                                                                                                                                                                                | Initial slope of light response curve                                         | molCO <sub>2</sub> mol[e] <sup>-1</sup>                | 48                   | 0.0   | 0.02 – 0.1    | 33                   | 0.1   | 0.0 – 0.1     |
|                                                                                                                                                                                | Convexity of light response curve                                             | NA                                                     | 45                   | 0.6   | 0.04 – 1.0    | 30                   | 0.7   | 0.1 – 0.9     |
|                                                                                                                                                                                | Light compensation point of photosynthesis                                    | μmol[e] m <sup>-2</sup> s <sup>-1</sup>                | 7                    | 53.1  | 32.4 – 87.5   | 17                   | 26.3  | 11.0 – 37.7   |
|                                                                                                                                                                                | Mass content of chlorophyll per foliage dry mass                              | mg g <sup>-1</sup>                                     | 243                  | 2.68  | 0.66 – 7.48   | 0                    | —     | —             |
|                                                                                                                                                                                | Ratio of chlorophyll a to chlorophyll b.                                      | NA                                                     | 45                   | 2.43  | 1.59 – 3.69   | 42                   | 2.61  | 2.34 – 2.99   |
|                                                                                                                                                                                | Mass content of Rubisco per foliage dry mass                                  | mg g <sup>-1</sup>                                     | 3                    | 19.5  | 12.4 – 26.6   | 0                    | —     | —             |
| Respiration                                                                                                                                                                    | Leaf dark respiration rate per area                                           | μmol m <sup>-2</sup> s <sup>-1</sup>                   | 128                  | 0.76  | 0.07 – 2.76   | 223                  | 0.65  | 0.02 – 3.10   |
|                                                                                                                                                                                | Leaf dark respiration rate per foliage dry mass                               | μmol kg <sup>-1</sup> s <sup>-1</sup>                  | 155                  | 4.40  | 0.44 – 24.00  | 3                    | 12.82 | 5.46 – 17.00  |
|                                                                                                                                                                                | Day respiration rate per foliage area                                         | μmol m <sup>-2</sup> s <sup>-1</sup>                   | 39                   | 5.45  | 1.50 – 14.27  | 0                    | —     | —             |
|                                                                                                                                                                                | Branch dark respiration rate per branch volume                                | μmol m <sup>-3</sup> s <sup>-1</sup>                   | 46                   | 378   | 56 – 2051     | 26                   | 274   | 21 – 1405     |
|                                                                                                                                                                                | Stem dark respiration rate per stem surface area                              | μmol m <sup>-2</sup> s <sup>-1</sup>                   | 207                  | 3.67  | 0.22 – 12.46  | 89                   | 1.55  | 0.24 – 4.44   |
|                                                                                                                                                                                | Root dark respiration rate per dry mass                                       | μmol kg <sup>-1</sup> s <sup>-1</sup>                  | 26                   | 4.57  | 2.52 – 7.32   | 23                   | 6.10  | 2.80 – 9.75   |
|                                                                                                                                                                                | Fineroot dark respiration rate per dry mass                                   | μmol kg <sup>-1</sup> s <sup>-1</sup>                  | 0                    | —     | —             | 107                  | 8.51  | 3.80 – 16.09  |
|                                                                                                                                                                                | Q10 measured for foliage                                                      | NA                                                     | 0                    | —     | —             | 30                   | 2.43  | 1.87 – 3.65   |
|                                                                                                                                                                                | Q10 measured for stem                                                         | NA                                                     | 18                   | 1.93  | 1.45 – 2.81   | 0                    | —     | —             |
|                                                                                                                                                                                | Stomatal conductance for CO <sub>2</sub> per foliage area (g <sub>san</sub> ) | mol m <sup>-2</sup> s <sup>-1</sup>                    | 59                   | 0.10  | 0.01 – 0.93   | 40                   | 0.08  | 0.001 – 0.52  |
|                                                                                                                                                                                | Stomatal conductance for CO <sub>2</sub> per foliage dry mass                 | mol kg <sup>-1</sup> s <sup>-1</sup>                   | 139                  | 0.43  | 0.03 – 2.00   | 24                   | 0.43  | 0.22 – 0.65   |
|                                                                                                                                                                                | Transpiration rate per foliage area (E <sub>an</sub> )                        | mmol m <sup>-2</sup> s <sup>-1</sup>                   | 76                   | 1.08  | 0.03 – 3.30   | 95                   | 2.77  | 0.11 – 17.0   |
| Water relation                                                                                                                                                                 | Transpiration rate per foliage dry mass                                       | mmol kg <sup>-1</sup> s <sup>-1</sup>                  | 395                  | 12.1  | 0.10 – 102.1  | 207                  | 6.19  | 0.01 – 41.7   |
|                                                                                                                                                                                | Sap flow density/velocity measured by Granier method.                         | cm <sup>3</sup> m <sup>-2</sup> s <sup>-1</sup>        | 88                   | 17.3  | 0.48 – 40.6   | 19                   | 17.9  | 6.1 – 46.1    |
|                                                                                                                                                                                | Sap flow density averaged for a day                                           | cm <sup>3</sup> m <sup>-2</sup> s <sup>-1</sup>        | 29                   | 8.4   | 3.0 – 20.0    | 24                   | 11.4  | 4.0 – 19.4    |
|                                                                                                                                                                                | Sap flow (or transpiration) per a tree per a day                              | kg d <sup>-1</sup>                                     | 112                  | 9.4   | 0.7 – 22.9    | 176                  | 12.6  | 1.1 – 67.2    |
|                                                                                                                                                                                | Soil to leaf hydraulic conductance per foliage area (K <sub>S-L</sub> )       | mmol m <sup>-2</sup> s <sup>-1</sup> MPa <sup>-1</sup> | 37                   | 0.6   | 0.2 – 1.3     | 9                    | 1.1   | 0.3 – 1.7     |
|                                                                                                                                                                                | Soil to leaf Hydraulic resistance per foliage mass                            | MPa kg s mmol <sup>-1</sup>                            | 64                   | 1.2   | 0.1 – 5.8     | 60                   | 1.2   | 0.0 – 10.1    |
|                                                                                                                                                                                | Stem (sapwood) specific conductivity (K <sub>stem</sub> )                     | kg m <sup>-1</sup> s <sup>-1</sup> MPa <sup>-1</sup>   | 18                   | 1.0   | 0.4 – 2.2     | 9                    | 1.3   | 0.3 – 2.3     |
|                                                                                                                                                                                | Predawn foliage water potential (Ψ <sub>pd</sub> )                            | MPa                                                    | 51                   | -0.4  | -2.1 – 0.0    | 132                  | -0.6  | -2.3 – 0.0    |
|                                                                                                                                                                                | Midday foliage water potential (Ψ <sub>md</sub> )                             | MPa                                                    | 370                  | -1.0  | -2.3 – -0.1   | 189                  | -1.3  | -2.5 – -0.3   |
|                                                                                                                                                                                | Osmotic potential at water saturation (Ψ <sub>msat</sub> )                    | MPa                                                    | 258                  | -1.6  | -2.7 – -0.7   | 93                   | -1.3  | -2.4 – -0.1   |
|                                                                                                                                                                                | Leaf water potential at turgor loss point (Ψ <sub>lp</sub> )                  | MPa                                                    | 262                  | -2.3  | -3.6 – -1.3   | 161                  | -2.3  | -4.1 – -0.9   |
|                                                                                                                                                                                | Water content at turgor loss point (RW <sub>Ctlp</sub> )                      | g g <sup>-1</sup>                                      | 101                  | 0.8   | 0.6 – 0.9     | 93                   | 0.7   | 0.5 – 0.8     |
| Leaf morphology                                                                                                                                                                | Bulk elastic modulus (E)                                                      | MPa                                                    | 101                  | 7.4   | 1.7 – 15.1    | 53                   | 4.4   | 0.6 – 10.7    |
|                                                                                                                                                                                | Branch water potential at 50% conductivity loss (Ψ <sub>50</sub> )            | MPa                                                    | 2                    | -4.8  | -5.2 – -4.4   | 2                    | -6.7  | -7.6 – -5.8   |
|                                                                                                                                                                                | Root water potential at 50% conductivity loss                                 | MPa                                                    | 1                    | -4.1  | -4.1 – -4.1   | 2                    | -3.1  | -4.3 – -2.0   |
|                                                                                                                                                                                | Water use efficiency                                                          | mg g <sup>-1</sup>                                     | 8                    | 4.9   | 3.6 – 5.4     | 8                    | 5.2   | 4.2 – 6.6     |
|                                                                                                                                                                                | 13C:12C ratio in leaves                                                       | ‰                                                      | 74                   | -27.4 | -30.1 – -24.7 | 44                   | -26.8 | -28.5 – -24.6 |
|                                                                                                                                                                                | Specific leaf area (SLA)                                                      | m <sup>2</sup> kg <sup>-1</sup>                        | 379                  | 4.9   | 1.5 – 16.9    | 244                  | 5.8   | 3.2 – 15.7    |
|                                                                                                                                                                                | Shoot silhouette area to projected needle area ratio (SPAR)                   | NA                                                     | 39                   | 0.6   | 0.5 – 0.7     | 0                    | —     | —             |
|                                                                                                                                                                                | Specific root length                                                          | m g <sup>-1</sup>                                      | 132                  | 13.3  | 0.2 – 48.4    | 196                  | 14.8  | 0.3 – 46.2    |
|                                                                                                                                                                                | Specific root surface area                                                    | cm <sup>2</sup> mg <sup>-1</sup>                       | 44                   | 0.2   | 0.0 – 0.4     | 3                    | 0.2   | 0.0 – 0.4     |

| Table 1. continued    |                                                              |                                    |      |                      |       |         |                      |       |       |   |       |  |  |
|-----------------------|--------------------------------------------------------------|------------------------------------|------|----------------------|-------|---------|----------------------|-------|-------|---|-------|--|--|
|                       |                                                              |                                    |      | Cryptomeria japonica |       |         | Chamaecyparis obtusa |       |       |   |       |  |  |
| Category              | Trait                                                        | Unit                               | n    | Mean                 | Range |         | n                    | Mean  | Range |   |       |  |  |
| Anatomy               | Number of stomata per foliage area                           | mm <sup>-2</sup>                   | 173  | 127.9                | 11.9  | – 342.0 | 7                    | 635.3 | 500.0 | – | 830.0 |  |  |
|                       | Width of stomata                                             | µm                                 | 3    | 65.8                 | 31.2  | – 85.3  | 2                    | 20.7  | 19.9  | – | 21.5  |  |  |
|                       | Length of stomata                                            | µm                                 | 21   | 47.9                 | 28.0  | – 111.9 | 2                    | 28.2  | 27.4  | – | 29.0  |  |  |
|                       | Cross sectional area of foliage xylem                        | µm <sup>2</sup>                    | 43   | 1639                 | 1048  | – 2380  | 33                   | 434   | 213   | – | 1104  |  |  |
|                       | Cross sectional area of foliage transfusion cell             | µm <sup>2</sup>                    | 46   | 9369                 | 3522  | – 16917 | 34                   | 367   | 43    | – | 1082  |  |  |
|                       | Tracheid length of early wood                                | mm                                 | 8    | 2.4                  | 1.3   | – 3.0   | 99                   | 2.3   | 0.9   | – | 3.6   |  |  |
|                       | Tracheid length of late wood                                 | mm                                 | 495  | 2.4                  | 0.8   | – 4.5   | 7                    | 2.8   | 1.8   | – | 3.8   |  |  |
|                       | Tracheid diameter (tangent) of early wood                    | µm                                 | 47   | 28.2                 | 21.6  | – 37.0  | 3                    | 24.0  | 21.0  | – | 26.0  |  |  |
|                       | Tracheid diameter (radial) of early wood                     | µm                                 | 56   | 35.2                 | 24.9  | – 51.6  | 3                    | 27.0  | 24.0  | – | 29.0  |  |  |
|                       | Tracheid diameter (tangent) of late wood                     | µm                                 | 32   | 25.5                 | 19.8  | – 30.1  | 3                    | 19.0  | 16.0  | – | 22.0  |  |  |
|                       | Tracheid diameter (radial) of late wood                      | µm                                 | 56   | 15.0                 | 9.0   | – 24.9  | 3                    | 14.7  | 13.0  | – | 16.0  |  |  |
| Wood density          | Basic density of stem                                        | g cm <sup>3</sup>                  | 640  | 0.35                 | 0.13  | – 0.59  | 44                   | 0.41  | 0.38  | – | 0.50  |  |  |
|                       | Basic density of branch                                      | g cm <sup>3</sup>                  | 31   | 0.32                 | 0.06  | – 0.65  | 0                    | —     | —     |   | —     |  |  |
|                       | Basic density of root                                        | g cm <sup>3</sup>                  | 4    | 0.42                 | 0.39  | – 0.45  | 4                    | 0.46  | 0.40  | – | 0.50  |  |  |
|                       | Basic density of fine root                                   | g cm <sup>3</sup>                  | 44   | 0.28                 | 0.17  | – 0.33  | 105                  | 0.29  | 0.17  | – | 0.80  |  |  |
| Resource use          | Nitrogen resorption efficiency of leaves                     | %                                  | 3    | 23.1                 | 5.5   | – 49.1  | 19                   | 39.4  | 23.4  | – | 56.4  |  |  |
|                       | N content of foliage litter fall                             | mg g <sup>-1</sup>                 | 6    | 7.8                  | 6.4   | – 8.3   | 52                   | 7.8   | 4.3   | – | 11.3  |  |  |
|                       | 15N:14N ratio in leaves                                      | ‰                                  | 4    | 2.0                  | -4.9  | – 9.0   | 4                    | 2.3   | -6.4  | – | 10.3  |  |  |
|                       | Leaf longevity                                               | year                               | 24   | 4.7                  | 2.9   | – 10.4  | 47                   | 4.6   | 1.9   | – | 8.3   |  |  |
|                       | Fineroot longevity                                           | year                               | 1    | 4.1                  | 4.1   | – 4.1   | 7                    | 2.3   | 1.3   | – | 5.3   |  |  |
| Nitrogen content      | Nitrogen content per foliage area (Na, Ns)                   | g m <sup>-2</sup>                  | 381  | 3.9                  | 1.0   | – 12.6  | 112                  | 2.5   | 0.8   | – | 4.1   |  |  |
|                       | Nitrogen content per foliage dry mass (Nm)                   | mg g <sup>-1</sup>                 | 2116 | 13.8                 | 4.5   | – 44.3  | 759                  | 14.1  | 6.7   | – | 32.4  |  |  |
|                       | Nitrogen content per stem dry mass                           | mg g <sup>-1</sup>                 | 163  | 5.0                  | 0.3   | – 16.2  | 32                   | 8.1   | 0.4   | – | 15.5  |  |  |
|                       | Nitrogen content per root dry mass                           | mg g <sup>-1</sup>                 | 152  | 7.8                  | 0.5   | – 27.5  | 41                   | 11.9  | 4.9   | – | 18.6  |  |  |
|                       | Nitrogen content per thick root (>20mm) dry mass             | mg g <sup>-1</sup>                 | 28   | 1.6                  | 0.3   | – 3.2   | 4                    | 1.2   | 0.2   | – | 2.4   |  |  |
|                       | Nitrogen content per thin root (<20mm, >2mm) dry mass        | mg g <sup>-1</sup>                 | 28   | 3.4                  | 0.6   | – 5.1   | 4                    | 3.6   | 3.0   | – | 4.3   |  |  |
|                       | Nitrogen content per fine root (<2mm) dry mass               | mg g <sup>-1</sup>                 | 63   | 9.8                  | 2.9   | – 18.2  | 107                  | 10.4  | 0.9   | – | 17.0  |  |  |
| Phosphorous content   | Phosphorus content per foliage dry mass (Pm)                 | mg g <sup>-1</sup>                 | 692  | 1.5                  | 0.5   | – 8.9   | 357                  | 1.6   | 0.4   | – | 8.1   |  |  |
|                       | Phosphorus content per stem dry mass                         | mg g <sup>-1</sup>                 | 163  | 0.5                  | 0.0   | – 3.5   | 32                   | 0.5   | 0.1   | – | 1.1   |  |  |
|                       | Phosphorus content per root dry mass                         | mg g <sup>-1</sup>                 | 145  | 0.9                  | 0.1   | – 7.3   | 34                   | 1.2   | 0.6   | – | 2.8   |  |  |
|                       | Phosphorus content of thick root (>20mm) dry mass            | mg g <sup>-1</sup>                 | 28   | 0.3                  | 0.1   | – 0.7   | 4                    | 0.4   | 0.2   | – | 0.7   |  |  |
|                       | Phosphorus content of thin root (<20mm, >2mm) dry mass       | mg g <sup>-1</sup>                 | 28   | 0.4                  | 0.2   | – 0.7   | 4                    | 0.3   | 0.2   | – | 0.4   |  |  |
|                       | Phosphorus content of fine root (<2mm) dry mass              | mg g <sup>-1</sup>                 | 26   | 0.6                  | 0.3   | – 1.4   | 4                    | 0.6   | 0.3   | – | 0.8   |  |  |
| Pottasium content     | Pottasium content per foliage mass (Km)                      | mg g <sup>-1</sup>                 | 722  | 8.1                  | 1.8   | – 37.2  | 354                  | 8.0   | 2.3   | – | 36.4  |  |  |
|                       | Pottasium content per stem dry mass                          | mg g <sup>-1</sup>                 | 163  | 3.0                  | 0.2   | – 12.2  | 32                   | 4.2   | 0.6   | – | 7.1   |  |  |
|                       | Pottasium content per root dry mass                          | mg g <sup>-1</sup>                 | 157  | 3.7                  | 0.2   | – 16.8  | 34                   | 4.1   | 1.4   | – | 14.8  |  |  |
|                       | Pottasium content per thick root (>20mm) dry mass            | mg g <sup>-1</sup>                 | 28   | 1.2                  | 0.7   | – 2.5   | 4                    | 1.0   | 0.8   | – | 1.2   |  |  |
|                       | Pottasium content per thin root (<20mm, >2mm) dry mass       | mg g <sup>-1</sup>                 | 28   | 1.9                  | 1.1   | – 2.6   | 4                    | 1.5   | 1.4   | – | 1.7   |  |  |
|                       | Pottasium content per fine root (<2mm) dry mass              | mg g <sup>-1</sup>                 | 26   | 2.2                  | 1.1   | – 4.3   | 4                    | 2.0   | 1.3   | – | 2.8   |  |  |
| Chemical composition  | Lignin content of foliage                                    | %                                  | 3    | 25.9                 | 23.6  | – 28.3  | 4                    | 24.4  | 23.6  | – | 25.6  |  |  |
|                       | Lignin content of foliage litter fall                        | %                                  | 2    | 34.8                 | 30.2  | – 39.4  | 1                    | 27.3  | 27.3  | – | 27.3  |  |  |
|                       | Lignin content of deadwood                                   | %                                  | 69   | 33.5                 | 30.2  | – 40.6  | 67                   | 31.3  | 28.4  | – | 38.1  |  |  |
|                       | Holocellulose content of foliage                             | %                                  | 3    | 48.1                 | 47.4  | – 48.9  | 4                    | 51.6  | 50.7  | – | 53.9  |  |  |
|                       | Holocellulose content of foliage litter fall                 | %                                  | 2    | 46.5                 | 45.5  | – 47.5  | 1                    | 42.4  | 42.4  | – | 42.4  |  |  |
|                       | Holocellulose content of deadwood                            | %                                  | 69   | 63.5                 | 55.0  | – 68.1  | 67                   | 65.6  | 57.7  | – | 69.0  |  |  |
|                       | Nitrogen content of deadwood                                 | g kg <sup>-1</sup>                 | 69   | 0.9                  | 0.2   | – 4.5   | 67                   | 0.6   | 0.1   | – | 2.1   |  |  |
|                       | Carbon content of deadwood                                   | g kg <sup>-1</sup>                 | 69   | 513.7                | 483.0 | – 537.0 | 67                   | 521.5 | 498.0 | – | 547.0 |  |  |
| Biomass               | Leaf biomass (LM)                                            | kg                                 | 150  | 4.1                  | 0.0   | – 57.1  | 77                   | 4.8   | 0.1   | – | 22.2  |  |  |
|                       | Stem+branch biomass                                          | kg                                 | 150  | 30.3                 | 0.0   | – 477.2 | 77                   | 43.3  | 1.6   | – | 208.4 |  |  |
|                       | Branch biomass                                               | kg                                 | 72   | 6.2                  | 0.0   | – 39.0  | 77                   | 4.8   | 0.1   | – | 23.2  |  |  |
|                       | Root biomass (RM)                                            | kg                                 | 195  | 7.2                  | 0.0   | – 146.4 | 100                  | 9.5   | 0.0   | – | 67.8  |  |  |
|                       | Thick root biomass (>20mm)                                   | kg                                 | 29   | 25.3                 | 0.8   | – 138.9 | 16                   | 15.9  | 2.2   | – | 59.5  |  |  |
|                       | Thin root biomass (<20mm, >2mm)                              | kg                                 | 29   | 3.3                  | 0.5   | – 6.0   | 16                   | 3.5   | 1.1   | – | 6.8   |  |  |
|                       | Fine root biomass (<2mm)                                     | kg                                 | 39   | 0.5                  | 0.0   | – 1.5   | 16                   | 0.7   | 0.2   | – | 1.5   |  |  |
| Allocation            | Annual allocation of net primary production to foliage       | t ha <sup>-1</sup> y <sup>-1</sup> | 94   | 4.8                  | 1.7   | – 7.7   | 22                   | 3.8   | 2.8   | – | 5.3   |  |  |
|                       | Annual allocation of net primary production to stem + branch | t ha <sup>-1</sup> y <sup>-1</sup> | 94   | 9.6                  | 2.1   | – 28.6  | 22                   | 9.9   | 6.4   | – | 13.6  |  |  |
|                       | Annual allocation of net primary production to branch        | t ha <sup>-1</sup> y <sup>-1</sup> | 80   | 1.8                  | 0.4   | – 5.1   | 21                   | 2.0   | 0.6   | – | 2.8   |  |  |
|                       | Annual allocation of net primary production to root          | t ha <sup>-1</sup> y <sup>-1</sup> | 94   | 2.7                  | 0.5   | – 7.4   | 22                   | 2.8   | 1.7   | – | 3.9   |  |  |
|                       | Annual foliage litterfall                                    | t ha <sup>-1</sup> y <sup>-1</sup> | 46   | 3.6                  | 0.9   | – 6.6   | 130                  | 3.2   | 0.8   | – | 6.0   |  |  |
| Stand characteristics | Annual branch + bark litterfall                              | t ha <sup>-1</sup> y <sup>-1</sup> | 26   | 0.8                  | 0.1   | – 3.7   | 83                   | 0.7   | 0.0   | – | 7.0   |  |  |
|                       | Leaf area index (LAI)                                        | NA                                 | 16   | 5.9                  | 2.1   | – 17.2  | 62                   | 7.0   | 2.0   | – | 12.4  |  |  |
|                       | LAI-based light absorption coefficient (k )                  | NA                                 | 6    | 0.4                  | 0.3   | – 0.5   | 1                    | 1.0   | 1.0   | – | 1.0   |  |  |
|                       | Leaf mass-based Light absorption coefficient                 | NA                                 | 2    | 0.3                  | 0.3   | – 0.3   | 2                    | 0.3   | 0.2   | – | 0.3   |  |  |

Table 2 Species name and abbreviations used in Figure 10. Data of *Cryptomeria japonica* and *Chamaecyparis obtusa* are from this study, and other data are from Pittermann et al. 2012.

| Species                                  | Abbr. | Phenology, native habitat                                    |
|------------------------------------------|-------|--------------------------------------------------------------|
| <i>Athrotaxis laxifolia</i>              | AL    | E, Montane forests, Tasmania                                 |
| <i>Austrocedrus chilensis</i>            | AC    | E, The Andes, Chile and Argentina                            |
| <i>Callitris macleayana</i>              | CM    | E, Mesic-dry forests, eastern Australia                      |
| <i>Calocedrus decurrens</i>              | CD    | E, Montane forests, United States–Mexican Pacific Coast      |
| <i>Chamaecyparis lawsoniana</i>          | CL    | E, Mixed forests, Oregon to northern California              |
| <i>Chamaecyparis obtusa</i> (This study) | CO*   | E, Mixed evergreen forests, Japan and Taiwan                 |
| <i>Cryptomeria japonica</i>              | CJ    | E, Mixed evergreen forests, Japan                            |
| <i>Cryptomeria japonica</i> (This study) | CJ*   | E, Mixed evergreen forests, Japan                            |
| <i>Cunninghamia lanceolata</i>           | CL    | E, Mixed broad-leaved forests of southeast Asia              |
| <i>Cupressus forbesii</i>                | CF    | E, Chaparral, southern California, northern Mexico           |
| <i>Fitzroya cupressoides</i>             | FC    | E, Evergreen rainforest, Chile                               |
| <i>Glyptostrobus pensilis</i>            | GP    | D, Riparian, southern China                                  |
| <i>Juniperus californica</i>             | JC    | E, Desert, southern California to northern Mexico            |
| <i>Libocedrus plumosa</i>                | LP    | E, Mixed conifer rainforests, New Zealand                    |
| <i>Metasequoia glyptostroboides</i>      | MG    | D, Mesic mixed forests, central China                        |
| <i>Sciadopitys verticillata</i>          | SC    | E, Temperate moist forests, Japan                            |
| <i>Sequoia sempervirens</i>              | SS    | E, northern coastal California                               |
| <i>Sequoiadendron giganteum</i>          | SG    | E, Sierra Nevada, California                                 |
| <i>Taiwania cryptomeroides</i>           | TC    | E, Cool temperate forests, Asia                              |
| <i>Taxodium distichum</i>                | TD    | D, Riparian regions in southeastern United States            |
| <i>Taxodium mucronatum</i>               | TM    | D, Southern Texas, Mexico, Central America                   |
| <i>Taxus baccata</i>                     | TB    | E, Broadly distributed across Europe                         |
| <i>Thuja plicata</i>                     | TP    | E, Mixed coniferous forests, United States Pacific northwest |
| <i>Thujopsis dolabrata</i>               | TO    | E, Coastal and montane Japan                                 |
| <i>Widdringtonia cedarbergensis</i>      | WC    | E, Fynbos, South Africa                                      |
